# Supplementary material for: Realist evaluation of a complex integrated care programme: protocol for a mixed methods study
Source: PubMed Central journal article supplement — BMJ Open. 2018 Mar 1;8(3):e017111. doi: 10.1136/bmjopen-2017-017111 (PMC5855239; doi:10.1136/bmjopen-2017-017111), 2018-03-01
Supplement: bmjopen-2017-017111.draft_revisions.pdf [file bmjopen-2017-017111.draft_revisions.pdf]

# BMJ Open

BMJ Open is committed to open peer review. As part of this commitment we make the peer review history of every article we publish publicly available.

When an article is published we post the peer reviewers' comments and the authors' responses online. We also post the versions of the paper that were used during peer review. These are the versions that the peer review comments apply to.

The versions of the paper that follow are the versions that were submitted during the peer review process. They are not the versions of record or the final published versions. They should not be cited or distributed as the published version of this manuscript.

BMJ Open is an open access journal and the full, final, typeset and author-corrected version of record of the manuscript is available on our site with no access controls, subscription charges or pay-per-view fees (<http://bmjopen.bmj.com>).

If you have any questions on BMJ Open's open peer review process please email [editorial.bmjopen@bmj.com](mailto:editorial.bmjopen@bmj.com)

# BMJ Open

## Realist evaluation of a complex integrated care program: a study protocol

|                                 |                                                                                                                                                                                                                                                                                                                                                                                                                                                                                                                                                                                                                                                                                                                                                                                                                                                                                                                                                                                                                                                                                                                                                                    |
|---------------------------------|--------------------------------------------------------------------------------------------------------------------------------------------------------------------------------------------------------------------------------------------------------------------------------------------------------------------------------------------------------------------------------------------------------------------------------------------------------------------------------------------------------------------------------------------------------------------------------------------------------------------------------------------------------------------------------------------------------------------------------------------------------------------------------------------------------------------------------------------------------------------------------------------------------------------------------------------------------------------------------------------------------------------------------------------------------------------------------------------------------------------------------------------------------------------|
| Journal:                        | <i>BMJ Open</i>                                                                                                                                                                                                                                                                                                                                                                                                                                                                                                                                                                                                                                                                                                                                                                                                                                                                                                                                                                                                                                                                                                                                                    |
| Manuscript ID                   | bmjopen-2017-017111                                                                                                                                                                                                                                                                                                                                                                                                                                                                                                                                                                                                                                                                                                                                                                                                                                                                                                                                                                                                                                                                                                                                                |
| Article Type:                   | Protocol                                                                                                                                                                                                                                                                                                                                                                                                                                                                                                                                                                                                                                                                                                                                                                                                                                                                                                                                                                                                                                                                                                                                                           |
| Date Submitted by the Author:   | 05-Apr-2017                                                                                                                                                                                                                                                                                                                                                                                                                                                                                                                                                                                                                                                                                                                                                                                                                                                                                                                                                                                                                                                                                                                                                        |
| Complete List of Authors:       | Nurjono, Milawaty; National University of Singapore, Centre for Health Services Research and Policy Research, Saw Swee Hock School of Public Health<br>Shrestha, Pami ; National University Health System, Regional Health System Planning Office<br>Lee, Alice; National University Health System, Regional Health System Planning Office<br>Lim, Xin Ya ; National University of Singapore, Saw Swee Hock School of Public Health<br>Shiraz, Farah ; National University of Singapore, Saw Swee Hock School of Public Health<br>Tan, Shermin ; National University Health System, Regional Health System Planning Office<br>Wong, Shing Hei Thomas ; National University Health System, Regional Health System Planning Office<br>Foo, Kah Mun ; National University Health System, Regional Health System Planning Office<br>Wee, Thomas ; National University Health System, Regional Health System Planning Office<br>Toh , Sue-Anne Ee Shioh; National University Health System, Regional Health System Planning Office<br>Yoong, Joanne<br>Vrijhoef, Hubertus ; University Hospital Maastricht, Department of Patient and Care; Vrije Universiteit Brussels |
| <b>Primary Subject Heading</b>: | Health services research                                                                                                                                                                                                                                                                                                                                                                                                                                                                                                                                                                                                                                                                                                                                                                                                                                                                                                                                                                                                                                                                                                                                           |
| Secondary Subject Heading:      | Public health                                                                                                                                                                                                                                                                                                                                                                                                                                                                                                                                                                                                                                                                                                                                                                                                                                                                                                                                                                                                                                                                                                                                                      |
| Keywords:                       | Realist Evaluation, Integrated Care, Mixed Methods Evaluation                                                                                                                                                                                                                                                                                                                                                                                                                                                                                                                                                                                                                                                                                                                                                                                                                                                                                                                                                                                                                                                                                                      |
|                                 |                                                                                                                                                                                                                                                                                                                                                                                                                                                                                                                                                                                                                                                                                                                                                                                                                                                                                                                                                                                                                                                                                                                                                                    |

SCHOLARONE™  
Manuscripts

## Realist evaluation of a complex integrated care program: a study protocol

Milawaty Nurjono<sup>1</sup>, Pami Shrestha<sup>2</sup>, Alice Lee<sup>2</sup>, Xin Ya Lim<sup>1</sup>, Farah Shiraz<sup>2,3</sup>, Shermin Tan<sup>2</sup>, Shing Hei Wong<sup>2</sup>, Kah Mun Foo<sup>2</sup>, Thomas Wee<sup>2</sup>, Sue-Anne Toh<sup>2</sup>, Joanne Yoong<sup>1,3,7</sup>, Hubertus Johannes Maria Vrijhoef<sup>4,5,6</sup>

<sup>1</sup> Centre for Health Services Research and Policy Research, Saw Swee Hock School of Public Health, National University Health System, Singapore

<sup>2</sup> Regional Health System Planning Office, National University Health System, Singapore

<sup>3</sup> Saw Swee Hock School of Public Health, National University of Singapore, Singapore

<sup>4</sup> Department of Patient and Care, University Hospital Maastricht, Maastricht, The Netherlands

<sup>5</sup> Vrije Universiteit Brussels, Brussels, Belgium

<sup>6</sup> Panaxea B.V., Amsterdam, the Netherlands

<sup>7</sup> Center for Economic and Social Research, University of Southern California, USA

Corresponding Author:

**Milawaty Nurjono**

Centre for Health Services and Policy Research

Saw Swee Hock School of Public Health, National University of Singapore

12 Science Drive 2 #10-01, Singapore 117549, Singapore,

E-mail: [ephmn@nus.edu.sg](mailto:ephmn@nus.edu.sg)

Phone: +(65)66013867, Fax: +(65)67791489

## Abstract

### Introduction

Due to the lack of acceptable methods of evaluation for complex integrated care programs, the net benefits of such interventions and understanding of how these are achieved remain uncertain. This leads to difficulties in the development, implementation, adaptation and scaling up of similar interventions. In this study, we evaluate an integrated care network, the National University Health System (NUHS) Regional Health System (RHS), consisting of acute hospitals, step down care, primary care providers, social services, home care and community partners using a theory driven realist evaluation approach. We examine the implementation fidelity and effectiveness of its constituting programs and gather evidence to inform future interventions within NUHS-RHS. By using a realist approach that balances the needs of context-specific evaluation with international comparability, this study carries the potential to address current research gaps.

### Methods and Analysis

The context, mechanism and outcomes of the NUHS-RHS are examined using a convergent parallel mixed method study. First, the context and working mechanisms that underpin the NUHS-RHS will be assessed through ethnographic observations of events, interviews with stakeholders and surveys. Second, implementation fidelity and outcomes of specific programs of the NUHS-RHS will be assessed through program document reviews, ethnographic observations of the conduct of program activities, structured interviews with program team members and healthcare users and prospective surveys with healthcare users. Data collected will be analysed according to the formula used in realist evaluation, findings on the context, mechanisms and implementation fidelity will be used to explain the outcomes.

### Ethics and dissemination

The National Healthcare Group, Singapore, Domain Specific Review Board (DSRB) reviewed and approved this study protocol. Study results will be published in international peer reviewed journals and presented at conferences and internally to NUHS-RHS and Ministry of Health, Singapore.

**Keywords:** Realist Evaluation, Integrated Care, Mixed Methods Evaluation

### Strengths and limitations of this study

- This study provides the first opportunity to holistically evaluate the NUHS-RHS, and one of the first to conduct a comprehensive evaluation of a new integrated care network in the context of South-East Asia.
- By adopting a theory-driven realist evaluation approach, findings from this study are expected to generate contextually relevant evidence for improving efficiency and effectiveness of integrated care in Singapore and similar health system. It is also expected to yield policy-relevant insights for national-level decision makers as they continue to monitor and refine integrated care models for Singapore over the coming years.
- The use mixed methods in this study allows us to draw on the strengths of both qualitative and quantitative methods, while overcoming the limitations of either methods if used alone. This enhances the credibility of the evaluation findings and allows for generation of in-depth insights.
- In designing this evaluation, relevant stakeholders including program team members, healthcare managers and policymakers were engaged, this provide confidence that the evaluation efforts are relevant and findings are likely to be adopted for improvement in current models and for development of future initiatives.
- While mixed methods design has been advocated for the evaluation of complex healthcare interventions, it is a relatively new method in comparison to the RCTs commonly used in the evaluation of medical interventions. Due to the lack of familiarity on the use of mixed methods in the field of health and healthcare research, this study design may draw criticism for not being as rigorous as the typical Randomized Controlled Trial (RCT).
- The use of mixed methods design increases complexity especially in terms of data analysis. Nonetheless, we strive to reach optimal integration of data at multiple levels – study design, methods, interpretation and reporting – using the convergent parallel mixed methods approach which connects and merges methods and findings.
- As participation in the evaluation efforts is voluntary and only individuals who are able or have proxies who are able to provide informed consent are included in this evaluation effort, we also recognize that selection bias may be introduced in this study. To account for selection bias, demographic information including age, gender, ethnicity and role (for healthcare providers) are collected and will be compared between responders and non-responders

## Introduction

Across the world, rapidly aging populations and increasing demand for healthcare services call for a paradigm shift from disease-centered healthcare provision to more holistic, people centered care<sup>1</sup>. People centered care involves putting people and communities, not diseases as the focus of health systems. It highlights the importance of empowering people to take charge of their health, takes into account holistic needs of a person and seeks to provide quality care timely and appropriately<sup>2</sup>. Integrated care supports people centered care by coordinating healthcare services in a way that ensures people receives a continuum of care at the different levels and sites of care within the health system according to their needs. As characterized by Valentijn et al., care integration can take place on many dimensions: at the micro-level clinical level, the meso-level professional or organizational level and the macro or systemic level<sup>3</sup>. As such, the types of interventions that qualify under the wide umbrella of “integrated care” vary tremendously, as do the settings in which they are introduced and their attendant benefits and costs. Moreover, introducing integrated care often calls for complex, multi-component programs that involve many stakeholders, sometimes with conflicting perspectives and interests. When implemented successfully, integrated people centered health services can be more effective, cost less, improve patient engagement and better prepared to respond to increasing demands for healthcare services<sup>4</sup>.

However, despite these growing needs and the availability of basic design principles related to integrated care, the development and implementation of such care models remains challenging. In every instance, there is a need for healthcare providers and organizations to understand which care models work, for whom and how they work in the unique setting in which integrated care is planned for a particular population. Current evaluations such as the “gold-standard” Randomized Controlled Trial (RCT) design rarely adequately or even explicitly address the context-specific drivers behind implementation outcomes and their relationship to the underlying program theory, making it difficult to interpret their findings in light of other programs in different settings. As a result, few evaluation strategies are widely-accepted as appropriate, and to date, the net benefit of integrated care interventions and understanding of how these are achieved remains empirically uncertain. It is therefore essential to develop comprehensive, rigorous and practical methods to evaluate person-centered integrated care programs, not to just inform the selection of effective and efficient interventions but also to facilitate improvement and scaling-up.

Realist evaluation, as first suggested by Pawson and Tilley, is a theory-driven based approach used to assess interventions which are assumed to be embedded in a social reality that influences how the intervention is implemented and how various actors in that reality respond to it<sup>5</sup>. A realist program theory specifies not only the outcomes are linked to the intervention, but also what mechanisms generate the outcomes and what features of the context affect them. The context-mechanism-outcome (CMO) configuration is used as the main structure for analysis, with the goal of identifying both causal mechanisms and contextual factors associated with variation in outcomes<sup>6</sup>. As such, a realist evaluation should include a theory-driven formative evaluation<sup>7</sup>, process evaluation<sup>8</sup> as well as outcomes evaluation, and should avoid the rigorously successionist format of experimental design. Pawson and Tilley argue that an intervention can only achieve successful outcomes if appropriate ideas are applied to the right context with appropriate social and cultural conditions. Realist evaluation is increasingly applied to the evaluation of complex healthcare interventions as it seeks to provide a more explicitly and in-depth understanding of what works, for whom and in what circumstances<sup>5</sup>.

[Manuscript] Realist Evaluation of a Complex Integrated Care Program: a Study Protocol

1  
2 Singapore is typical of many other countries with a rapidly aging population that is accompanied by an  
3 increasing prevalence of chronic and complex illnesses<sup>9</sup>. Designed with an emphasis on providing episodic  
4 care within acute hospitals in a largely disease specific manner and controlling infectious disease in a young  
5 population, Singapore's health system now faces the challenge of ensuring appropriate care and long-term fiscal  
6 sustainability for a long-lived population at increasing risk of multiple chronic diseases<sup>10</sup>. In addition, having  
7 already reached the highest levels of efficiency in the world<sup>11</sup>, simple or easy fixes to increase performance while  
8 keeping costs low are increasingly rare. A radical change in vision and strategy is therefore needed, requiring  
9 complex systems-level interventions that break down existing siloes to refocus on prevention, primary care, and  
10 community-based management. Such interventions will need to be built on a strong foundation of integrated  
11 care.

12  
13 Therefore, in 2012, the Ministry of Health (MOH) Singapore launched a major initiative to reorganize healthcare  
14 at the national level into six clusters or Regional Health Systems (RHS) to foster care integration<sup>12</sup>. This was  
15 recently reorganized in 2017, into three integrated clusters to better meet future healthcare needs<sup>13</sup>. Every  
16 RHS comprises of a network each led by a major public hospital working in close partnership with health care  
17 providers (primary care providers, community hospitals, nursing homes, home care and day rehabilitation  
18 providers) and social care providers (including Senior Activity Centers, Grassroots organizations and Social  
19 Service Offices) within the same geographical region. Each RHS has the mandate and funding support to  
20 design and implement integrated care programs that leverage this network to provide healthcare beyond the  
21 hospital to the community, value-driven healthcare and holistic care across the entire care continuum in a cost-  
22 effective way<sup>14</sup>. To support this common vision, every RHS was tasked to implement programmes identified by  
23 the MOH to be of priority and held accountable for same outcomes jointly agreed on between the MOH and the  
24 RHSes throughout the country. Following this lead, each RHS implemented the priority programs tailored to the  
25 unique needs and demographic of the population in which it serves as well as the different strengths of  
26 community partners within its network. Other programs unique to respective RHSes were also developed and  
27 implemented accordingly.

28  
29 In this study, we propose to take advantage of a unique opportunity to document and evaluate the formation and  
30 implementation of a multi-pillared regional integrated care network. This evaluation study began in June 2016 at  
31 the National University Hospital System (NUHS)- RHS, the RHS at the western part of Singapore. The  
32 evaluation will be conducted using a realist evaluation approach, which seeks to test and refine the program  
33 theory while assessing whether and how the program succeeds in the local setting, in order to generate  
34 important insights not just for Singapore but for the wider field of integrated care research.

### 35 36 37 38 39 40 41 42 43 44 45 46 47 48 49 50 **Specific Aims**

51  
52 The specific aims of the evaluation are

- 53 (i) To examine the nature and working mechanisms of the NUHS Regional Health System (RHS) as an  
54 integrated care network;
- 55 (ii) To examine the implementation fidelity and effectiveness of its constituent programs;
- 56 (iii) To gather evidence to inform future interventions targeted at individuals with multiple chronic conditions.

57  
58  
59 [Manuscript] Realist Evaluation of a Complex Integrated Care Program: a Study Protocol

## Research Questions

In accordance with the aims of the evaluation, this study is designed to answer the following research questions at two levels i.e. the level of RHS and level of its individual programs respectively:

1. **Level of RHS:** How does the NUHS-RHS work to achieve its intended outcomes according to various stakeholders involved?
2. **Program Level:**
  - a. Have the NUHS-RHS programs been implemented as intended? What are the moderating factors and barriers in the implementation of the programs?
  - b. What are the effects of the NUHS-RHS programs on healthcare utilization, healthcare outcomes and care experiences?
  - c. What are the effects of NUHS-RHS programs on healthcare cost?

## Methods and Analysis

Considering the developmental nature of the NUHS-RHS, this evaluation is designed primarily as a formative evaluation which incorporates outcome valuation principles<sup>15</sup>. Evaluation findings will be used to further improve the health system as it continues to develop. The realist evaluation approach is adopted to provide the overall methodological guide. Beyond the assessment of whether the NUHS-RHS has achieved its intended outcomes, this evaluation is also designed to answer how and why NUHS-RHS and its constituting interventions work, or do not work, by examining the context (C), mechanism (M) and outcomes (O) of the NUHS-RHS.

A logic model depicted in Figure 1 provides the graphical description of the NUHS-RHS and how it is expected to work to achieve its intended outcomes. It is used as the basis of evaluation and as a guiding tool to focus our evaluation activities. This logic model is designed in collaboration with the RHS strategic planning office together healthcare providers.

As illustrated under activities on Figure 1, programs (P1-6) describes the MOH priority programs implemented nationally. The NUHS-RHS Integrated Interventions and Care Extension (P1) program aims to help patients with complex conditions who were admitted at least three or more times a year through a holistic case management. NUHS Transition Care Program (P2) was implemented to enable patients to transit smoothly from hospital to homes through a multidisciplinary team to ensure continuity of care. Appropriate Sitting of Care (P3 and P4) aims to ensure appropriate sitting of patients who are medically stable and deemed to not required specialist care from acute hospital to the community through partnership with primary and community care providers. Health Promotion and Disease Management (P5) focuses on health education, early detection of chronic diseases and timely interventions to prevent development of chronic illnesses as well as slow down the deterioration of diseases. Strengthening of primary and community care within the NUHS-RHS (P6) is achieved through cross deployment of skilled manpower from the acute hospital to the partnering primary and community

[Manuscript] Realist Evaluation of a Complex Integrated Care Program: a Study Protocol



care providers so as to improve the capability and confidence of the partners of the NUHS-RHS. Leveraging on tele-health and IT enablers, the Carehub aims to provide a single point of contact through individual's continuum of care post hospital discharge. The Primary Care Network (PCN) brings together a group of family physicians and community partners to create a support network for patients with chronic medical conditions in the community<sup>16</sup>.

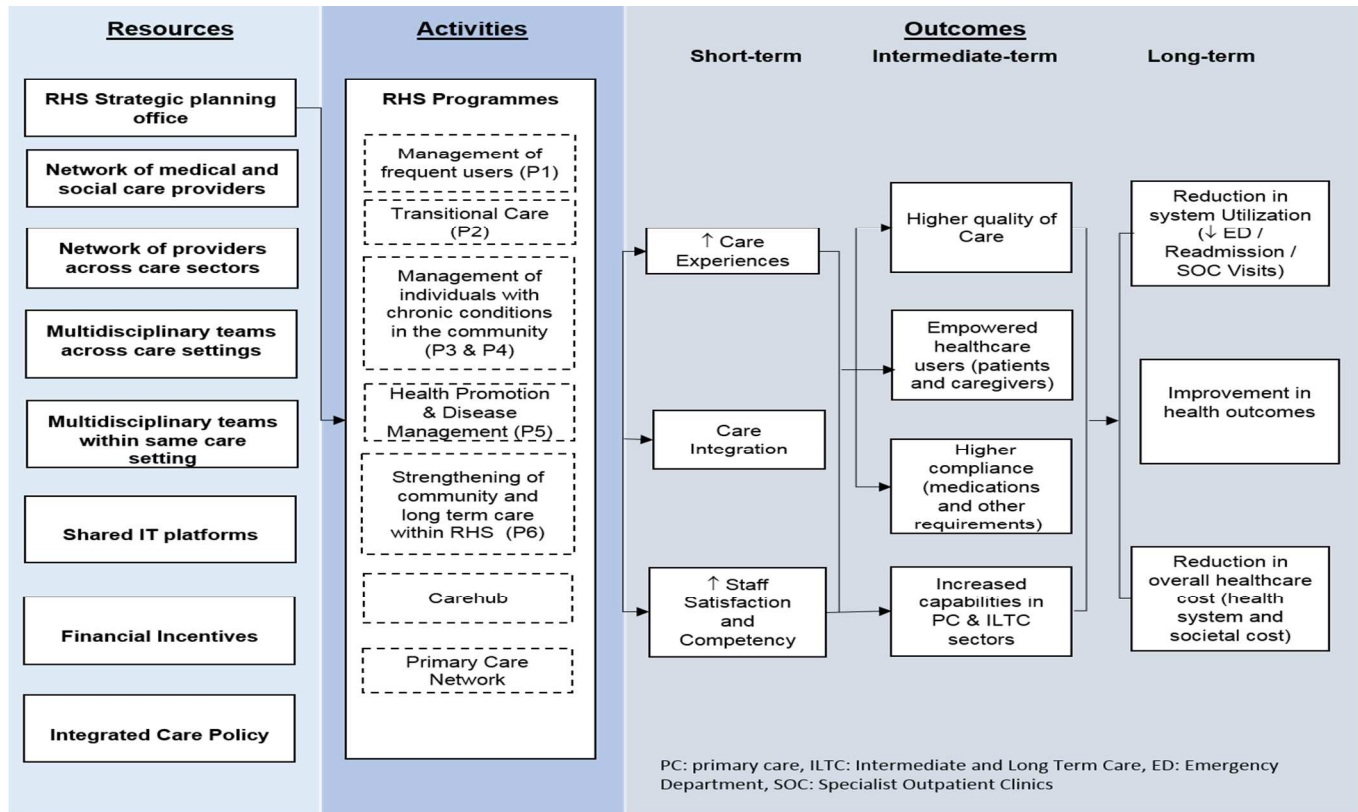

Figure 1: Logic model of NUH-RHS

### Prioritization of NUHS-RHS Programs for Evaluation

As the number of programs undertaken under the purview of the NUHS-RHS is large, programs were prioritized for evaluation in consultation with stakeholders including healthcare providers and administrators, based on (i) maturity of program, (ii) urgency for evaluation, (iii) complexity of programs and (iv) scientific importance.

Program maturity was assessed based on the duration of program implementation. A program that had been implemented for a longer duration was considered to more mature and given higher priority than one which was recently implemented. Programs nearing the end of their funding period were also given higher priority for evaluation, as evaluation was essential to inform the future development of the program. Complexity was determined by assessing the number of dimensions of integrated care as defined previously (clinical, professional, organizational, systematic, normative and functional integration)<sup>3</sup>. A program that set out to

integrate care in more dimensions was considered to be more complex than one which integrated care in fewer dimensions.

Finally, scientific importance was examined by a knowledge gap analysis conducted by reviewing available published articles relevant to these programs on PubMed. A program with the least number of relevant articles was considered to be of greatest scientific importance. According to these criteria, MN and HJMV ranked various NUHS-RHS programs as low, medium and high priority for evaluation. Through the priority-setting process, four programs, P1, P2, P3 and P4, were identified to be the best candidate programs for evaluation.

### Study Design

A convergent parallel mixed methods study will be conducted at two levels (Figure 2). First, the context and working mechanisms that underpin the NUHS-RHS as a whole will be assessed through ethnographic observation of management meetings, interviews with stakeholders and surveys to assess the level of integration from providers' perspectives. Second, implementation fidelity and outcomes of the four specific programs will be assessed. Overall fidelity of the respective NUHS-RHS programs will be examined through program document reviews, ethnographic observations of program activities and structured interviews with program team members and healthcare users. Structured interviews with the beneficiaries of the programs and time series analysis of the changes in outcomes associated with the various programs will be conducted.

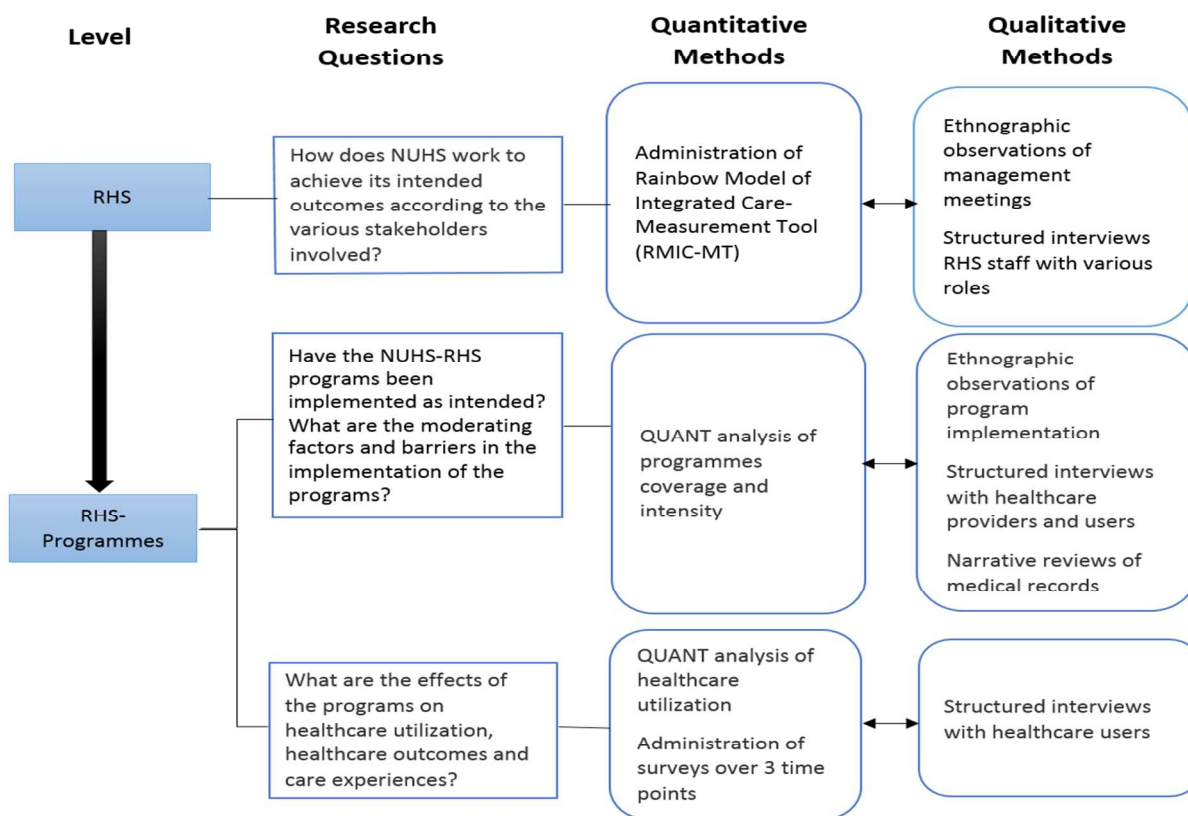

Figure 2: Convergent Parallel Mixed Methods Design of NUHS-RHS Evaluation

## Study population

Two distinct groups of study participants – healthcare providers/managers and healthcare users – are selected based on defined criteria in this study. Healthcare providers/managers who are a part of the governance, planning and implementation of the programs are invited to take part in structured interviews and to complete the online Rainbow Model of Integrated Care (RMIC) survey<sup>17</sup>, while healthcare users, including patients or proxies (caregivers), are invited for structured interviews or prospective surveys over three time points. Interactions between healthcare providers and healthcare users will be observed.

## Study Procedures

Research Question 1: How does NUHS-RHS work to achieve its intended outcomes from the perspectives of various stakeholders involved?

## Measures

The RMIC<sup>3</sup>, a comprehensive framework for care integration has been adopted to guide data collection and analysis to answer research question 1. Developed through a systematic literature review and validated by international Delphi panels, the RMIC describes six dimensions of care integration (clinical, professional, organizational, functional and normative integration) across different levels within a health system needed to provide a continuous, comprehensive and coordinated delivery of services to the individual and population<sup>18</sup>. Based on the RMIC, the working mechanism of the NUHS-RHS will be examined through ethnographic observations of team meetings and interviews with healthcare providers, and administration of the RMIC measurement tool (MT) adapted to Singapore<sup>17 19</sup>. Observation notes will be taken and interviews will be audio recorded and transcribed. Tested and validated in Singapore, the RMIC-MT was developed to measure the extent of care integration from the healthcare providers' perspectives. It consists of 62 items grouped into eight factors of integrated care related to person-focused and population-based care, clinical integration, professional, organizational, systematic, functional and normative integration. The RMIC-MT uses a four point Likert scale ranging from "never" to "all the time" and an additional option of "not sure/don't know"<sup>17</sup>.

## Analysis

Observation notes and interview transcripts will subsequently be thematically coded by two independent researchers using a two-step approach. The first step consists of a deductive analysis, where units of data are coded according to the RMIC. This will be followed by an inductive analysis, where new themes or unexpected findings are elicited through coding and categorizing.

Incomplete RMIC-MT will be excluded from analysis and missing data will be imputed with median score of each item. Then, the RMIC-MT will be scored according to the eight dimensions of RMIC as described above and as [Manuscript] Realist Evaluation of a Complex Integrated Care Program: a Study Protocol

the total score of integrated care. The extent of integrated care within NUHS will be compared against the extent of integrated care in other health systems in which the RMIC-MT has been administered. After which, data collected qualitatively and through the RMIC-MT would be merged according to the RMIC to answer research question 1.

Research Question 2: Have the programs been implemented as intended? What are the moderating factors for the implementation of the programs?

### Measures

The modified version of the Conceptual Framework of Implementation Fidelity (CFIF)<sup>20</sup> highlights important mechanisms and moderating factors for implementation of complex interventions, and is adopted to guide data collection and analysis to answer research question 2. Content, frequency and dose of program implementation and the moderating factors affecting implementation fidelity, including participant responsiveness, intervention complexity, comprehensiveness of policy description, strategies to facilitate implementation, quality of delivery, recruitment and context will be assessed. Data will be gathered through reviews of program documents, medical records, structured interviews healthcare providers and observations of actual delivery of interventions as described in Table 1.

|                    | Specific component                      | Data sources                                                                                                                         |
|--------------------|-----------------------------------------|--------------------------------------------------------------------------------------------------------------------------------------|
| Adherence          | Content                                 | Ethnographic observation, medical records review and interview with program team members                                             |
|                    | Frequency / duration                    | Medical records review, interview with program team members and healthcare users                                                     |
|                    | Coverage                                | Program databases, interview with program team members                                                                               |
| moderating factors | Participant responsiveness              | Ethnographic observation, interview with program team members and healthcare users and possibly medical records review (if recorded) |
|                    | Intervention complexity                 | Program documents (protocols, guidelines)                                                                                            |
|                    | Comprehensiveness of policy description | Program documents (protocols, guidelines)                                                                                            |
|                    | Strategies to facilitate implementation | Interview with program team members                                                                                                  |
|                    | Quality of delivery                     | Interview with healthcare users                                                                                                      |
|                    | Recruitment                             | Program database, interview with program team members                                                                                |

|  |         |                                     |
|--|---------|-------------------------------------|
|  | Context | Interview with program team members |
|--|---------|-------------------------------------|

Table 1: Assessment of Implementation Fidelity of NUHS-RHS programs

Program documents including guidelines and databases will be reviewed by evaluators. Program guidelines will be examined to provide an understanding of the planned activities for each program and the proposed mechanisms of achieving targeted outcomes. The number of eligible patients referred, response rate, reasons for non-enrolment into the programs, frequency of program delivery as well as duration of enrolment will be retrieved from the existing program databases to determine the coverage, frequency and duration of respective programs. Furthermore, medical records of patients enrolled into the programs will be reviewed to provide a comprehensive picture of patient's healthcare journey from enrolment to discharge. Medical records will be proportionately sampled based on the number of healthcare providers that are able to provide referrals within each program and the time point at which patients are enrolled into the programs.

Healthcare providers (physicians, nurses, and other allied health professionals), and healthcare managers (care coordinators and healthcare administrators) who are involved in the planning, development and implementation of the four programs are invited to participate in face-to-face structured interviews. Written informed consent and demographic information including their age, gender, duration of involvement and roles will be collected prior to the interviews. Guided by the CFIF, content of interventions and moderating factors, which may have contributed or hampered the implementation of the interventions, will be assessed during interviews. All interviews will be audio-recorded, transcribed verbatim and coded thematically.

Two sessions of ethnographic observations (induction and follow up) for each study participant will be randomly conducted at patients' homes and/or through phone calls depending on where and how the interventions are provided. We expect to observe two sessions each for approximately 30 participants from each program and informed consent will be obtained from participants. Content of care delivery, interactions between healthcare professionals and users together patients' responses to the service will be observed. For each session, field notes will be taken, findings will be written in narratives and analyzed thematically.

### Analysis

Data from the various sources will subsequently be analyzed according to the modified version of the CFIF. The extent of which the intervention components were implemented will be rated on a 5-points Likert scale ranging from never to always by two independent evaluators. Potential moderating factors which affect the implementation of the programs will be assessed by examining participant responsiveness, comprehensiveness of protocols/guidelines, support available to facilitate recruitment and implementation, quality of service delivery and context (patient, professionals, organizational, political and economic factors).

1  
2  
3  
4 Questions 3: What are the effects of the programs on healthcare utilization, healthcare outcomes and care  
5 experiences?  
6

### 7 **Measures**

8  
9 The Chronic Care Model (CCM) identifies the community, the health system, self-management support, delivery  
10 system design, decision support and clinical information systems as key elements of a health system that are  
11 essential to provide good quality chronic care <sup>21</sup>. Healthcare utilization, healthcare outcomes and patients  
12 reported experiences and outcomes associated with the NUHS-RHS programs will be assessed through review  
13 of clinical indicators, structured interviews and administration of surveys as described below, to identify  
14 alignment with the CCM.  
15  
16  
17

18  
19 The effect of the program on healthcare utilization will be measured by analyzing the number of admissions,  
20 Emergency Department (ED) attendance, number of specialist outpatient clinic (SOC) attendances, average bed  
21 days, for patients enrolled from the start of the programs. To capture the potentially evolving nature of the  
22 programs and their effects, data will be collected over various time points with respect to their respective date of  
23 enrollment program– 12 months before (T-12), 9 months before (T-9), 6 months before (T-6), 3 months before  
24 (T-3), date of enrolment (T0), 3 months after (T3), 6 months after (T6), 9 months after (T9), 12 months after  
25 (T12) and 15 months after (T15). Demographic information (gender, age, race, comorbidity and socio-economic  
26 status) will also be retrieved for all patients.  
27  
28  
29  
30  
31

32 Clinical indicators at various time points for all patients who are enrolled and decline will be extracted from the  
33 existing NUHS-RHS databases. In reference to the point of patients' enrolment into the programs, clinical  
34 indicators at T-12, T-9, T-6, T-3, T0, T3, T6, T9, T12 and T15 will be extracted. In addition, 8-item Morisky  
35 Medication Adherence Scale (MMAS-8) will be used to assess patients' compliance to prescribed medications <sup>22</sup>.  
36 The MMAS-8 is a structured self-report measure of medication-taking behaviour that has been widely used in  
37 various cultures and is considered a gold standard of measurement <sup>23</sup>.  
38  
39  
40  
41

42 The effect of the programs on patient- reported outcomes, patients' quality of life, care experience and self-  
43 efficacy will be assessed using validated survey instruments over 3 time points, at the starting point, mid-way  
44 and the end of the program. Quality of life of patients will be assessed using the EuroQoL- 5 Dimension (EQ-5D)  
45 instrument. The EQ-5D consists of 5 items, which recognizes the fundamental importance of independent  
46 physical, emotional and social functioning, as part of a more holistic view of health. It has been validated in  
47 Singapore and is a common measure used to assess quality of life as the result of healthcare interventions <sup>24</sup>.  
48 Patients' perception of the quality of care received will be examined using the Patient Assessment of Care for  
49 Chronic Conditions (PACIC) <sup>25</sup>. The PACIC seeks to understand the frequency with which various aspects of  
50 care patients with chronic conditions received from their healthcare providers aligned with components of the  
51 Chronic Care Model (CCM). The healthcare providers include regular doctors, nurse, care coordinators, allied  
52 health providers and others. PACIC has been widely validated and used at various healthcare settings across  
53 the world <sup>26-29</sup>.  
54  
55  
56  
57  
58  
59

60 [Manuscript] Realist Evaluation of a Complex Integrated Care Program: a Study Protocol

1  
2  
3  
4  
5 Patients' experience of care continuity will be assessed using the CCAENA (Continuity of care between care  
6 levels) questionnaire. The CCAENA consists of 29 items and assesses continuity of care across different levels  
7 from the patients' perspectives<sup>30</sup>. The components covered by the CCAENA include the relationships between  
8 patient and primary care providers, and between specialists and primary care providers. Finally, self-efficacy is  
9 measured using the Patient Activation Measure (PAM), which consists of 13 items will be used to measure  
10 patient knowledge, skill, and confidence for self-management<sup>31</sup>.  
11  
12  
13  
14

15 Complementary to the quantitative analysis of outcomes, a more in-depth understanding of healthcare users'  
16 perception of healthcare quality, including why and how it has worked, or did not work, will be explored  
17 qualitatively through interviews with healthcare users. Healthcare users including patients and their family  
18 members who have had experiences with the programs for at least 3 months are invited to take part in face to  
19 face interviews. Interviews are structured according to the program logic model, and key components of the  
20 Chronic Care Model (CCM)<sup>21</sup>. Perception of the level of care integration as well as recommendations for  
21 improvement to the programs will also be elicited during the interviews. Potential participants will be recruited  
22 through care coordinators and will be screened against the selection criteria by the study team prior to the  
23 interviews. Only those who are eligible and are willing to be audio recorded will be interviewed. Written informed  
24 consent and demographic information will be attained from the participants before proceeding with the  
25 interviews. Interviews will be conducted in English, Chinese or Malay at the patients' homes or at NUHS. Notes  
26 will be taken during observations and all interviews are audio recorded, transcribed verbatim and will be  
27 imported to Atlas.ti 7.0 for analysis.  
28  
29  
30  
31  
32  
33  
34  
35

### 36 **Analysis**

37 To examine the effects of the NUHS-RHS programs on healthcare utilizations, healthcare outcomes and care  
38 experiences, interrupted time series analysis (ITSA) will be conducted for all programs. In addition, difference in  
39 difference (DID) analysis will be conducted for those with comparison groups<sup>32 33</sup>. Proposed to be more flexible  
40 compared to the traditional randomized controlled trials analysis, the ITSA is conducted to estimate the changes  
41 associated with the introduction of interventions over time. To estimate changes in the above outcomes, time  
42 series regression that includes data from patients enrolled into the programs 1 year prior to and after referral to  
43 the programs will also be run. The model will have 3 main parameters: 1. Estimation of the annual trend in  
44 healthcare utilization (i.e. hospital admission, SOC attendances, ED attendances and average bed days) and  
45 clinical indicators one year before until the introduction of the programs 2. Estimation of changes in all outcomes  
46 associated with introduction of the programs; 3. The trend change in outcomes associated with each year. For  
47 each outcome, we will apply a generalized estimating equation model clustering by the combination of age, sex,  
48 and comorbidity score with robust standard errors and an autoregressive correlation matrix. We will report rate  
49 ratios (RRs) calculated from the parameter estimations, which represent population-averaged rates. DID  
50 analysis will subsequently be performed to estimate the impact of the programs by comparing differential effects  
51  
52  
53  
54  
55  
56  
57  
58  
59  
60

1  
2 in the outcomes between intervention and comparison groups. Sensitivity analyses will be performed and  
3 confounding effects will be accounted for.  
4

5 Observation notes and interview transcripts will be thematically coded by two independent researchers using a  
6 two-steps approach. The first step consists of a deductive analysis, where units of data are coded according to  
7 the CCM. This will be followed by an inductive analysis, where new themes or unexpected findings are elicited  
8 through coding and categorizing. If the interviews were conducted in other languages beside English, these will  
9 be transcribed and the analysis will be conducted by a researcher that is fluent in that language. The relevant  
10 quotes representative of the analysis will then be translated into English. Subsequently, data collected through  
11 prospective surveys and interviews with healthcare users will be merged using the CCM as a framework.  
12

#### 13 Research Question 4: What are the effect of NUHS-RHS programs on healthcare cost?

##### 14 **Measures**

15 Six categories of costs including (i) development costs (ii) program implementation costs (iii) healthcare  
16 utilization costs (inpatient, outpatient and community) (iv) productivity costs incurred to patients and/or  
17 caregivers (v) travel costs borne by patients for travelling to receive care and (vi) caregiving cost will be collected  
18 <sup>34</sup>. Costs categories (i), (ii), (iii) are considered costs related to the healthcare system whereas categories (iv)-(vi)  
19 take into account costs from the societal perspective.  
20

21 Development costs include costs incurred during the development of the NUHS-RHS and their respective  
22 programs. The program implementation costs take into account costs related to the implementation of the  
23 programs including the manpower costs, travel costs, costs of equipment, and costs of materials used for patient  
24 and caregiver training and costs associated with multidisciplinary team meetings. The development and  
25 implementation costs will be systematically collected using WHO's CostIt instrument <sup>35</sup> and will be divided by the  
26 number of clients included into the programs to obtain per patient cost.  
27

28 The cost of healthcare utilizations (hospital inpatient, outpatient services, primary and community care services),  
29 productivity costs (estimated based on absence from paid employment due to illness or providing care), travel  
30 costs (distance to healthcare providers and expenses incurred related to providing care to enrolled patients) and  
31 caregiving costs (cost related to the hire of domestic helpers, costs related to improvement in home environment  
32 and costs of caregiver training) will be collected using routinely collected hospitals data and a cost questionnaire  
33 administered to participants at T0 and T12 where each participant will be asked to recall his/her expenses 3  
34 months prior to the time of the interview.  
35

##### 36 **Analysis**

37 After, differences in costs according to their categories before and after enrollment in NUHS-RHS programs will  
38 be analyzed using paired Wilcoxon tests. The difference will be considered statistically significant if the p-value <  
39 0.05. Paired analysis will be adjusted by age, gender and number of co-morbidities at baseline. To estimate the  
40 cost-effectiveness of the right-site care programs, changes in quality of life as measured in Quality adjusted life  
41 years (QALYs) obtained based on the EQ-5D will be used as the measure of program effectiveness and  
42 incremental cost-effectiveness ratio (ICER) will be computed. The ICER will be estimated based on changes in  
43 health system and societal costs divided by the mean of changes in QALYs. The program will be considered  
44

45 [Manuscript] Realist Evaluation of a Complex Integrated Care Program: a Study Protocol  
46  
47  
48  
49  
50  
51  
52  
53  
54  
55  
56  
57  
58  
59  
60



1  
2 cost effective if the ICER is lower than Singapore-specific thresholds. Currently, in the absence of a formal  
3 nationally-accepted threshold, we will adapt a default threshold consistent with WHO CHOICE benchmarks of  
4 approximately \$60-75000 per QALY<sup>36</sup>. The appropriate cost-effectiveness thresholds will be reviewed and  
5 updated to be consistent with national best practice at the time of completion of the analysis.  
6  
7

### 8 **Data Integration**

9 Finally, to provide an overall evaluation of the NUHS-RHS taking into consideration various perspectives,  
10 qualitative and quantitative data obtained from various stakeholders including the program team members and  
11 patients/proxies will be integrated. The study team will first analyze the data collected for the individual research  
12 questions 1-4, using the respective guiding conceptual framework for each research question. Assessment of  
13 the fit of data integration will be conducted by examining the coherence of findings from various methods used,  
14 as suggested by Fetters et al<sup>37</sup>. Next, study findings from research questions 1 and 2 on the context and  
15 working mechanism of NUHS-RHS and implementation fidelity of the programs will be used to explain the  
16 outcomes for research questions 3 and 4, using the CMO formula of the realist evaluation method. A few  
17 potential CMO configurations will then be proposed and discussed (for validation purposes) through 2-3 focus  
18 group discussions comprising of 8-10 different stakeholders each. This approach is expected to enable the study  
19 team to make firm recommendations.  
20  
21  
22  
23  
24  
25  
26

### 27 **Ethics and dissemination**

28 Data collection for this study was started in June 2016 and is expected to continue until June 2019. The National  
29 Healthcare Group, Singapore, Domain Specific Review Board reviewed and approved this study protocol Board  
30 (DSRB Ref: 2016/00410 and 2016/00914). Written informed consent forms are obtained from participants  
31 (healthcare providers and users) included for interviews and surveys. To maintain confidentiality of the research  
32 participants, identifiable information obtained from research participants are kept securely under password  
33 protection. A unique respondent identification is assigned to each study participant so that data can be  
34 processed anonymously. Waiver of informed consent was obtained for analysis of retrospective data collected  
35 as part of the hospital and Ministry of Health (MOH) routine data collection and no identifiable data are known by  
36 the researchers. Study results will be written up and published in international peer reviewed journals and will be  
37 presented at national, international conferences and internally at NUHS-RHS and the MOH, Singapore  
38  
39  
40  
41  
42  
43  
44

### 45 **Mitigation of Potential Risks and Limitations**

46 While mixed methods design has been advocated for the evaluation of complex healthcare interventions, it is a  
47 relatively new method in comparison to the RCTs commonly used in the evaluation of medical interventions. Due  
48 to the lack of familiarity on the use of mixed methods in the field of health and healthcare research, this study  
49 design may draw criticism for not being as rigorous as the typical RCT. Furthermore, we acknowledge that the  
50 use of mixed methods design also increases complexity. Nonetheless, we strive to reach optimal integration of  
51 data at multiple levels – study design, methods, interpretation and reporting – using the convergent parallel  
52 mixed methods approach which connects and merges methods and findings.  
53  
54  
55  
56  
57  
58  
59  
60

1  
2 Furthermore, as participation in the evaluation efforts is voluntary and only individuals who are able or have  
3 proxies who are able to provide informed consent are included in this evaluation effort, we also recognize that  
4 selection bias may be introduced in this study. To account for selection bias, demographic information including  
5 age, gender, ethnicity and role (for healthcare providers) are collected and will be compared between  
6 responders and non-responders. Given the prospective nature of some of our data collection methods,  
7 difficulties in following up with respondents are also anticipated. To minimize the numbers lost to follow up,  
8 research appointments are scheduled at participants' time and place of convenience in collaboration with  
9 participants' care coordinators. In the event when loss to follow is inevitable due to death, survival analysis will  
10 be conducted to account for the missing data.  
11  
12  
13  
14  
15

16  
17 In addition, it must be acknowledged that as much as it was intended for the delivery of care to be consistent,  
18 variability in the extent of how care was provided exists, especially across different disease specific subprograms  
19 and also within individual sub-program. To account for such variability, subgroup analysis will be conducted and  
20 adjustments based on the number of care providers within a subprogram will also be made.  
21  
22  
23

## 24 Discussion

25 Singapore is in the early phase of developing new integrated care models. Notwithstanding the scope of more  
26 general design principles of integrated care, development and implementation of integrated care requires  
27 adaptation to the context, needs of the local population and the capacity and capability of local healthcare  
28 providers. To the best of our knowledge, this study provides the first opportunity to holistically evaluate the  
29 NUHS-RHS, and one of the first to conduct a comprehensive evaluation of a new integrated care network in the  
30 context of South-East Asia.  
31  
32  
33  
34  
35

36 Given the complex nature of integrated care programs and the research questions of this study, mixed method  
37 research was adopted to provide a holistic and in-depth evaluation to generate insights applicable for various  
38 stakeholders. The use of both quantitative and qualitative methods in the validation and confirmation of findings  
39 will allow us to draw on the strengths of both methods, while overcoming the limitations of either methods if used  
40 alone. This enhances the credibility of the evaluation findings and allows for generation of in-depth insights.  
41  
42  
43  
44

45 This study carries significant implications for the health system and society in Singapore as well as for the field of  
46 integrated care internationally. By ensuring the rigor of this evaluation and adopting a realist approach, findings  
47 from this study are expected to generate contextually relevant evidence for improving efficiency and  
48 effectiveness of the NUHS-RHS as it develops and also to inform future initiatives of the NUHS. It is also  
49 expected to yield policy-relevant insights for national-level decision makers as they continue to monitor and  
50 refine the RHS model for Singapore over the coming years. In designing this evaluation, stakeholders including  
51 program team members, healthcare managers and policymakers were engaged to help evaluators understand  
52 the context in which the programs were implemented, how interventions have been delivered, to define  
53 objectives, evaluation questions and outcomes which are relevant to the stakeholders and to identify constraints  
54 to the feasibility of implementation of the evaluation itself. Various potential pitfalls in evaluation design and  
55  
56  
57  
58  
59

1  
2 implementation have been collectively identified and risk management strategies put into place wherever  
3 possible. This provides confidence that the evaluation efforts are rigorous, relevant and has the potential to  
4 provide insights for program improvement as well as provide evidence to support policy decisions to scale-  
5 up/down activities within NUHS. Engagement of stakeholders early in the evaluation efforts is also expected to  
6 increase the likelihood that recommendations will be adopted to improve the relevant components of the existing  
7 care models and define future new care models. On the other hand, the involvement of stakeholders may exert  
8 pressure to act on preliminary findings. Understanding these dynamics will also be of interest as part of the  
9 evaluation itself.  
10  
11  
12  
13

14  
15 Like NUHS, other integrated care networks within Singapore and abroad are experimenting with new integrated  
16 care models. However, the findings from existing research of the (cost-)effectiveness of integrated care are to a  
17 major extent inconsistent because of the variations in the strategic outcomes, methods of implementation,  
18 contexts (i.e. system and policy) and/or applied evaluation measures. Examples include next generation  
19 accountable care organisations in the United States <sup>38</sup>, integrated care pioneers and vanguard sites in England  
20 <sup>39 40</sup>, population health management pilots in the Netherlands <sup>41</sup>, integrated care pilots in Belgium <sup>42</sup> and  
21 the integrated care demonstrators in Australia <sup>43</sup>. This study provides an opportunity to fill some of the gaps in  
22 current research by evaluating the NUHS-RHS and its constituent programs using a rigorous and  
23 comprehensive design that balances the needs of context-specific evaluation with international comparability.  
24 Wherever possible, steps such as using internationally validated instruments for evaluation of chronic disease  
25 are taken, to allow for meaningful international comparisons that can increase collective knowledge about the  
26 restructuring of chronic care models towards advancing integrated care.  
27  
28  
29  
30  
31  
32  
33  
34  
35  
36  
37  
38  
39  
40  
41  
42  
43  
44  
45  
46  
47  
48  
49  
50  
51  
52  
53  
54  
55  
56  
57  
58  
59  
60

1  
2  
3  
4  
5  
6  
7  
8  
9  
10  
11  
12  
13  
14  
15  
16  
17  
18  
19  
20  
21  
22  
23  
24  
25  
26  
27  
28  
29  
30  
31  
32  
33  
34  
35  
36  
37  
38  
39  
40  
41  
42  
43  
44  
45  
46  
47  
48  
49  
50  
51  
52  
53  
54  
55  
56  
57  
58  
59  
60

## References:

1. World Health Organization. WHO global strategy on people-centred and integrated health services- interim report 2015.
2. Starfield B. Is Patient-Centered Care the Same As Person-Focused Care? *The Permanente Journal* 2011;15(2):63-69.
3. Valentijn PP, Schepman SM, Opheij W, et al. Understanding integrated care: a comprehensive conceptual framework based on the integrative functions of primary care. *International Journal of Integrated Care* 2013;13:e010.
4. World Health Organization. Integrated Health Services - What and Why? . Geneva, 2008.
5. Pawson R, Tilley N. Realistic Evaluation. London SAGE 1997.
6. Berwick DM. The science of improvement. *JAMA* 2008;299(10):1182-84. doi: 10.1001/jama.299.10.1182
7. Parry GJ, Carson-Stevens A, Luff DF, et al. Recommendations for Evaluation of Health Care Improvement Initiatives. *Academic Pediatrics* 2013;13(6, Supplement):S23-S30. doi: <http://dx.doi.org/10.1016/j.acap.2013.04.007>
8. Craig P, Dieppe P, Macintyre S, et al. Developing and evaluating complex interventions: the new Medical Research Council guidance. *The BMJ* 2008;337:a1655. doi: 10.1136/bmj.a1655
9. Ministry of Health Singapore. STATE OF HEALTH Report of the Director of Medical Services 2003-2012. Singapore
10. Evans J, Baker G, Berta W, et al. The evolution of integrated health care strategies. *Advances in Health Care Management* 2013;15:125-61.
11. Bloomberg. Bloomberg Best (And Worst): Most Efficient Healthcare 2014: Countries 2017 [Available from: <https://www.bloomberg.com/graphics/best-and-worst/#most-efficient-health-care-2014-countries2017>].
12. Ministry of Health. Healthcare 2020: Improving Accessibility, Quality & Affordability 2012.
13. Ministry of Health S. Reorganisation of healthcare system into three integrated clusters to better meet future healthcare needs 2017 [Available from: [https://www.moh.gov.sg/content/moh\\_web/home/pressRoom/pressRoomItemRelease/2017/reorganisation-of-healthcare-system-into-three-integrated-cluste.html](https://www.moh.gov.sg/content/moh_web/home/pressRoom/pressRoomItemRelease/2017/reorganisation-of-healthcare-system-into-three-integrated-cluste.html)] accessed 01 March 2017.
14. Ministry of Health Singapore. Speech by Minister for Health, Mr Gan Kim Yong, at the MOH Committee of Supply Debate 2016 [Available from: [https://www.moh.gov.sg/content/moh\\_web/home/pressRoom/speeches\\_d/2016/speech-by-minister-for-health--mr-gan-kim-yong--at-the-moh-commit.html2017](https://www.moh.gov.sg/content/moh_web/home/pressRoom/speeches_d/2016/speech-by-minister-for-health--mr-gan-kim-yong--at-the-moh-commit.html2017)].
15. CDC. Types of Evaluation 2017 [Available from: <https://www.cdc.gov/std/Program/pupestd/Types%20of%20Evaluation.pdf2017>].
16. System NUH. Regional Health System - Our Programmes [Available from: <http://www.nuhs.edu.sg/regional-health-system/programmes.html2016>].
17. Nurjono M, Valentijn PP, Bautista MAC, et al. Psychometric Validation of Rainbow Model of Integrated Care Measurement Tool (RMIC-MT) within Singapore's Regional Health Systems [Submitted for publication] 2016
18. Valentijn PP, Vrijhoef HJM, Ruwaard D, et al. Towards an international taxonomy of integrated primary care: a Delphi consensus approach. *BMC Family Practice* 2015;16:64. doi: 10.1186/s12875-015-0278-x
19. Nurjono M, Valentijn PP, Bautista MAC, et al. A Prospective Validation Study of a Rainbow Model of Integrated Care Measurement Tool in Singapore. *International Journal of Integrated Care* 2016;16(1):1. doi: 10.5334/ijic.2021
20. Hasson H. Systematic evaluation of implementation fidelity of complex interventions in health and social care. *Implementation Science* 2010;5(1):67. doi: 10.1186/1748-5908-5-67
21. Wagner E, Austin B, Davis C, et al. Improving Chronic Illness Care: Translating Evidence Into Action. *Health Affairs* 2001;20(6):64-78.
22. Wang Y, Kong M. Psychometric properties of the 8-item Morisky Medication Adherence Scale in patients taking warfarin *Thrombosis and Haemostasis* 2012;108(4):589-800.

- 1  
2 23. Lam WY, Fresco P. Medication Adherence Measures: An Overview. *BioMed Research International*  
3 2015;2015:217047. doi: 10.1155/2015/217047  
4 24. Wee H, Loke W, Li C, et al. Cross-Cultural Adaptation and Validation of Singapore Malay and Tamil Versions  
5 of the EQ-5D. *Annals of the Academy of Medicine, Singapore* 2007;36(6):403-8.  
6 25. Glasgow RE, Wagner EH, Schaefer J, et al. Development and Validation of the Patient Assessment of Chronic  
7 Illness Care (PACIC). *Medical Care* 2005;43(5):436-44.  
8 26. Krucien N, Le Vaillant M, Pelletier-Fleury N. Adaptation and validation of the patient assessment of chronic  
9 illness care in the French context. *BMC Health Services Research* 2014;14:269-69. doi: 10.1186/1472-6963-  
10 14-269  
11 27. Cramm JM, Nieboer AP. Factorial validation of the patient assessment of chronic illness care (PACIC) and  
12 PACIC short version (PACIC-S) among cardiovascular disease patients in the Netherlands. *Health and Quality*  
13 *of Life Outcomes* 2012;10:104-04. doi: 10.1186/1477-7525-10-104  
14 28. Shah NR, Aragones A, Schaefer EW, et al. Validation of the Spanish Translation of the Patient Assessment of  
15 Chronic Illness Care (PACIC) Survey. *Preventing Chronic Disease* 2008;5(4):A113.  
16 29. Liu L-J, Li Y, Sha K, et al. Patient Assessment of Chronic Illness Care, Glycemic Control and the Utilization of  
17 Community Health Care among the Patients with Type 2 Diabetes in Shanghai, China. *PLoS ONE*  
18 2013;8(9):e73010. doi: 10.1371/journal.pone.0073010  
19 30. Aller M-B, Vargas I, Garcia-Subirats I, et al. A tool for assessing continuity of care across care levels: an  
20 extended psychometric validation of the CCAENA questionnaire. *International Journal of Integrated Care*  
21 2013;13:e050.  
22 31. Hibbard JH, Mahoney ER, Stockard J, et al. Development and Testing of a Short Form of the Patient  
23 Activation Measure. *Health Services Research* 2005;40(6 Pt 1):1918-30. doi: 10.1111/j.1475-  
24 6773.2005.00438.x  
25 32. Linden A, Adams J, Roberts N. Evaluating Disease Management Program Effectiveness: An Introduction to  
26 Time Series Analysis *Disease Management* 2003;6(4):243-55.  
27 33. Kontopantelis E, Doran T, Springate DA, et al. Regression based quasi-experimental approach when  
28 randomisation is not an option: interrupted time series analysis. *The BMJ* 2015;350:h2750. doi:  
29 10.1136/bmj.h2750  
30 34. Tsiachristas A. Payment and economic evaluation of integrated care. *International Journal of Integrated*  
31 *Care* 2015;15(2) doi: <http://doi.org/10.5334/ijic.2009>  
32 35. World Health Organization. CostIt [Available from: [http://www.who.int/choice/toolkit/cost\\_it/en/](http://www.who.int/choice/toolkit/cost_it/en/) accessed  
33 16th March 2016.  
34 36. World Health Organization. Cost effectiveness and strategic planning (WHO-CHOICE) 2017 [Available from:  
35 [http://www.who.int/choice/costs/CER\\_levels/en/](http://www.who.int/choice/costs/CER_levels/en/) accessed 20 Dec 2016 2016.  
36 37. Feters MD, Curry LA, Creswell JW. Achieving Integration in Mixed Methods Designs—Principles and  
37 Practices. *Health Services Research* 2013;48(6 Pt 2):2134-56. doi: 10.1111/1475-6773.12117  
38 38. Centres for Medicare & Medicaid Services. Next Generation ACO Model 2016 [Available from:  
39 <https://innovation.cms.gov/initiatives/Next-Generation-ACO-Model/> accessed 15 June 2016.  
40 39. England N. Integrated Care Pioneers 2016 [Available from: <https://www.england.nhs.uk/pioneers/> accessed  
41 15 June 2016.  
42 40. England N. Health and high quality care for all, now and for future generations 2016 [Available from:  
43 <https://www.england.nhs.uk/ourwork/futurenhs/new-care-models/> accessed 15 June 2016.  
44 41. Kodner D. All together now: a conceptual exploration of integrated care *Healthcare Quarterly* 2009;13 Spec  
45 6-15.  
46 42. GIDS. PILOOTPROJECTEN GEINTEGREERDE ZORG VOOR CHRONISCH ZIEKEN 2016 [Available from:  
47 [http://www.health.belgium.be/sites/default/files/uploads/fields/fpshealth\\_theme\\_file/gids\\_pilootprojecte](http://www.health.belgium.be/sites/default/files/uploads/fields/fpshealth_theme_file/gids_pilootprojecte)  
48 [n\\_geintegreerde\\_zorg\\_voor\\_chronisch\\_zieken.pdf](http://www.health.belgium.be/sites/default/files/uploads/fields/fpshealth_theme_file/gids_pilootprojecte) accessed 15 June 2016  
49 43. NSW Government. Integrated Care Demonstrators 2016 [Available from:  
50 <http://www.health.nsw.gov.au/wohp/Pages/demonstrators.aspx> accessed 15 June 2016.  
51  
52  
53  
54  
55  
56  
57  
58  
59

**Funding**

This study is funded by NUHS Research Office (Grant No: NUHSRO/2016/008/RO5+5/FY16CF/LOA) awarded to Mr Thomas Wee.

**Authors' contributions**

SAT, TW and HJMV initiated the study and HJMV conceptualized the study. HJMV and MN designed and constructed the first draft of study protocol. ST, SHW, KMF, SAT, TW and JY reviewed study protocol and provided feedback for the refinement of the protocol. MN, PS, AL, XYL, ST, SHW and KMF are involved in data collection and MN, PS, XYL and FS will be involved in data analysis related to this study. MN wrote up the first draft and final version of the manuscript. All authors read, provided suggestions for revision and approved the final manuscript.

**Acknowledgments**

We would like to thank Gerald Koh, Lim Yee Wei and Wee Hwee Lin for their advices for this study.

**Data sharing statement**

For access to the data set, a formal request should be sent to the corresponding author. The request will only be considered when the primary results of the study have been published

**Competing Interests**

ST, SHW, KMF, SAT and TW are a part of the NUHS-RHS strategic planning office which is involved in the planning and development of programmes under the purview of the NUHS-RHS.

# BMJ Open

## Realist evaluation of a complex integrated care program using a mixed method study protocol

|                                 |                                                                                                                                                                                                                                                                                                                                                                                                                                                                                                                                                                                                                                                                                                                                                                                                                                                                                                                                                                                                                                                                                                                                                                   |
|---------------------------------|-------------------------------------------------------------------------------------------------------------------------------------------------------------------------------------------------------------------------------------------------------------------------------------------------------------------------------------------------------------------------------------------------------------------------------------------------------------------------------------------------------------------------------------------------------------------------------------------------------------------------------------------------------------------------------------------------------------------------------------------------------------------------------------------------------------------------------------------------------------------------------------------------------------------------------------------------------------------------------------------------------------------------------------------------------------------------------------------------------------------------------------------------------------------|
| Journal:                        | <i>BMJ Open</i>                                                                                                                                                                                                                                                                                                                                                                                                                                                                                                                                                                                                                                                                                                                                                                                                                                                                                                                                                                                                                                                                                                                                                   |
| Manuscript ID                   | bmjopen-2017-017111.R1                                                                                                                                                                                                                                                                                                                                                                                                                                                                                                                                                                                                                                                                                                                                                                                                                                                                                                                                                                                                                                                                                                                                            |
| Article Type:                   | Protocol                                                                                                                                                                                                                                                                                                                                                                                                                                                                                                                                                                                                                                                                                                                                                                                                                                                                                                                                                                                                                                                                                                                                                          |
| Date Submitted by the Author:   | 17-Jun-2017                                                                                                                                                                                                                                                                                                                                                                                                                                                                                                                                                                                                                                                                                                                                                                                                                                                                                                                                                                                                                                                                                                                                                       |
| Complete List of Authors:       | Nurjono, Milawaty; National University of Singapore, Centre for Health Services Research and Policy Research, Saw Swee Hock School of Public Health<br>Shrestha, Pami ; National University Health System, Regional Health System Planning Office<br>Lee, Alice; National University Health System, Regional Health System Planning Office<br>Lim, Xin Ya; National University of Singapore, Saw Swee Hock School of Public Health<br>Shiraz, Farah ; National University of Singapore, Saw Swee Hock School of Public Health<br>Tan, Shermin ; National University Health System, Regional Health System Planning Office<br>Wong, Shing Hei Thomas ; National University Health System, Regional Health System Planning Office<br>Foo, Kah Mun ; National University Health System, Regional Health System Planning Office<br>Wee, Thomas ; National University Health System, Regional Health System Planning Office<br>Toh , Sue-Anne Ee Shioh; National University Health System, Regional Health System Planning Office<br>Yoong, Joanne<br>Vrijhoef, Hubertus ; University Hospital Maastricht, Department of Patient and Care; Vrije Universiteit Brussels |
| <b>Primary Subject Heading</b>: | Health services research                                                                                                                                                                                                                                                                                                                                                                                                                                                                                                                                                                                                                                                                                                                                                                                                                                                                                                                                                                                                                                                                                                                                          |
| Secondary Subject Heading:      | Public health                                                                                                                                                                                                                                                                                                                                                                                                                                                                                                                                                                                                                                                                                                                                                                                                                                                                                                                                                                                                                                                                                                                                                     |
| Keywords:                       | Realist Evaluation, Integrated Care, Mixed Methods Evaluation                                                                                                                                                                                                                                                                                                                                                                                                                                                                                                                                                                                                                                                                                                                                                                                                                                                                                                                                                                                                                                                                                                     |
|                                 |                                                                                                                                                                                                                                                                                                                                                                                                                                                                                                                                                                                                                                                                                                                                                                                                                                                                                                                                                                                                                                                                                                                                                                   |

SCHOLARONE™  
Manuscripts

## Realist evaluation of a complex integrated care program using a mixed method study protocol

Milawaty Nurjono<sup>1</sup>, Pami Shrestha<sup>2</sup>, Alice Lee<sup>2</sup>, Xin Ya Lim<sup>1</sup>, Farah Shiraz<sup>2,3</sup>, Shermin Tan<sup>2</sup>, Shing Hei Wong<sup>2</sup>, Kah Mun Foo<sup>2</sup>, Thomas Wee<sup>2</sup>, Sue-Anne Toh<sup>2</sup>, Joanne Yoong<sup>1,3,7</sup>, Hubertus Johannes Maria Vrijhoef<sup>4,5,6</sup>

<sup>1</sup> Centre for Health Services Research and Policy Research, Saw Swee Hock School of Public Health, National University Health System, Singapore

<sup>2</sup> Regional Health System Planning Office, National University Health System, Singapore

<sup>3</sup> Saw Swee Hock School of Public Health, National University of Singapore, Singapore

<sup>4</sup> Department of Patient and Care, University Hospital Maastricht, Maastricht, The Netherlands

<sup>5</sup> Vrije Universiteit Brussels, Brussels, Belgium

<sup>6</sup> Panaxea B.V., Amsterdam, the Netherlands

<sup>7</sup> Center for Economic and Social Research, University of Southern California, USA

Corresponding Author:

**Milawaty Nurjono**

Centre for Health Services and Policy Research

Saw Swee Hock School of Public Health, National University of Singapore

12 Science Drive 2 #10-01, Singapore 117549, Singapore,

E-mail: [ephmn@nus.edu.sg](mailto:ephmn@nus.edu.sg)

Phone: +(65)66013867, Fax: +(65)67791489



## Abstract

### Introduction

The lack of understanding on how complex integrated care programs achieve their outcomes due to the lack of acceptable methods leads to difficulties in the development, implementation, adaptation and scaling up of similar interventions. In this study, we evaluate an integrated care network, the National University Health System (NUHS) Regional Health System (RHS), consisting of acute hospitals, step down care, primary care providers, social services and community partners using a theory driven realist evaluation approach. This study aims to examine how and for whom the NUHS-RHS works to improve healthcare utilisations, outcomes, care experiences and reduce healthcare costs. By using a realist approach that balances the needs of context-specific evaluation with international comparability, this study carries the potential to address current research gaps.

### Methods and Analysis

This evaluation will be conducted in three research phases: 1. development of initial program theory (IPT) underlying the NUHS-RHS; 2. testing of program theory using empirical data; 3. refinement of IPT. IPT was elicited and developed through reviews of program documents, informal discussions and in-depth interviews with relevant stakeholders. Then, a convergent parallel mixed method study will be conducted to assess context (C), mechanisms (M) and outcomes (O) to test the IPT. Findings will then be analyzed according to the realist evaluation formula of CMO in which findings on the context, mechanisms will be used to explain the outcomes. Finally, based on findings gathered, IPT will be refined to highlight how to improve the NUHS-RHS by detailing what works (outcome), as well as how (mechanisms) and under what conditions (context).

### Ethics and dissemination

The National Healthcare Group, Singapore, Domain Specific Review Board (DSRB) reviewed and approved this study protocol. Study results will be published in international peer reviewed journals and presented at conferences and internally to NUHS-RHS and Ministry of Health, Singapore.

**Keywords:** Realist Evaluation, Integrated Care, Mixed Methods Evaluation

### Strengths and limitations of this study

- This study provides the first opportunity to holistically evaluate the NUHS-RHS, and one of the first to conduct a comprehensive evaluation of a new integrated care network in the context of South-East Asia.
- By adopting a theory-driven realist evaluation approach, findings from this study are expected to generate contextually relevant evidence for improving efficiency and effectiveness of integrated care in Singapore and similar health system. It is also expected to yield policy-relevant insights for national-level decision makers as they continue to monitor and refine integrated care models for Singapore over the coming years.
- The use mixed methods in this study allows us to draw on the strengths of both qualitative and quantitative methods, while overcoming the limitations of either methods if used alone. This enhances the credibility of the evaluation findings and allows for generation of in-depth insights.
- In designing this evaluation, relevant stakeholders including program team members, healthcare managers and policymakers were engaged, this provide confidence that the evaluation efforts are relevant and findings are likely to be adopted for improvement in current models and for development of future initiatives.
- While realist evaluation and mixed methods design have been advocated for the evaluation of complex healthcare interventions, it is a relatively new method in comparison to the RCTs commonly used in the evaluation of medical interventions. Due to the lack of familiarity on the use of mixed methods in the field of health and healthcare research, this study design may draw criticism for not being as rigorous as the typical Randomized Controlled Trial (RCT).
- The use of mixed methods design increases complexity especially in terms of data analysis. Nonetheless, we strive to reach optimal integration of data at multiple levels – study design, methods, interpretation and reporting – using the convergent parallel mixed methods approach which connects and merges methods and findings.
- As participation in the evaluation efforts is voluntary and only individuals who are able or have proxies who are able to provide informed consent are included in this evaluation effort, we also recognize that selection bias may be introduced in this study. To account for selection bias, demographic information including age, gender, ethnicity and role (for healthcare providers) are collected and will be compared between responders and non-responders

## Introduction

Across the world, rapidly aging populations and increasing demand for healthcare services call for a paradigm shift from disease-centered healthcare provision to more holistic, people centered care<sup>1</sup>. People-centered care involves placing people and communities at the focus of health systems not diseases. It highlights the importance of empowering people to take charge of their health, takes into account holistic needs of a person and seeks to provide quality care timely and appropriately<sup>2</sup>. Integrated care supports people-centered care by coordinating healthcare services in a way that ensures people receive a continuum of care at the different levels and sites of care within the health system, according to their needs. The World Health Organization (WHO)'s framework of people centered integrated care describes the complexity of such interventions and the need to involve various stakeholders in their execution. Complex multi-component delivery strategies are also typically recommended<sup>1</sup>.

As characterized by Valentijn et al., care integration can take place on many dimensions: at the micro-level clinical level, the meso-level professional or organizational level and the macro or systemic level<sup>3</sup>. The types of interventions that qualify under the wide umbrella of "integrated care" vary tremendously, as do the settings in which they are introduced and their attendant benefits and costs. Moreover, introducing integrated care often calls for complex, multi-component programs that involve many stakeholders, sometimes with conflicting perspectives and interests. When implemented successfully, integrated people centered health services can be more effective, cost less, improve patient engagement and better prepared to respond to increasing demands for healthcare services<sup>4</sup>.

However, despite these growing needs and the availability of basic design principles related to integrated care, the development and implementation of such care models remains challenging. In their systematic review, Suter et al identified ten universal principles for successful health systems integration including (i) comprehensive services across the continuum of care, (ii) person-centeredness, (iii) collaboration between organisations (iv), standardized care delivery through interprofessional teams, (v) performance management, (vi) information systems, (vii) organizational culture, (viii) professional integration, (ix) good governance and (x) financial management<sup>5</sup>. Furthermore, it is acknowledged that successful implementation of integrated care requires an effective composition of interventions at the micro-, meso- and macro-levels<sup>6 7</sup>. However, the multifaceted interplay between the building blocks of integrated care and the influence of various contextual factors on outcomes render the development of a simple and standardized implementation model impossible<sup>8</sup>. In every instance, there is a need for healthcare providers and organizations to understand which care models work, for whom and how they work in the unique setting in which integrated care is planned for a particular population so as to facilitate implementation and ensure longer term sustainability in a longer term<sup>9</sup>.

Current evaluations such as the "gold-standard" Randomized Controlled Trial (RCT) design rarely adequately or even explicitly address the context-specific drivers behind implementation outcomes and their relationship to the underlying program theory, making it difficult to interpret their findings in light of other programs in different settings. As a result, few evaluation strategies are widely-accepted as appropriate, and to date, the net benefit of integrated care interventions and understanding of how these are achieved remains empirically uncertain. It is therefore essential to develop comprehensive, rigorous and practical methods to evaluate person-centered integrated care programs, not to just inform the selection of effective and efficient interventions but also to facilitate improvement and scaling-up. In the evaluation of such complex interventions, the Medical Research Council (MRC) argues for the importance of process evaluation in conjunction with outcome evaluation, to account for variability in implementation<sup>10</sup>. The MRC's process evaluation framework guides evaluators to understand the implementation processes (what is implemented and how), mechanisms of intervention (how the delivery of the intervention produces change) and contextual factors that affect implementation and outcomes<sup>11</sup>.

Singapore is typical of many other countries with a rapidly aging population that is accompanied by an increasing prevalence of chronic and complex illnesses<sup>12</sup>. Designed with an emphasis on providing episodic care within acute hospitals in a largely disease specific manner and controlling infectious disease in a young population, Singapore's health system now faces the challenge of ensuring appropriate care and long-term fiscal

1  
2 sustainability for a long-lived population at increasing risk of multiple chronic diseases<sup>13</sup>. In addition, having  
3 already reached the highest levels of efficiency in the world<sup>14</sup>, simple or easy fixes to increase performance while  
4 keeping costs low are increasingly rare. A radical change in vision and strategy is therefore needed, requiring  
5 complex systems-level interventions that bring about changes of organizational, policy, power and financing  
6 structures and break down existing siloes within the healthcare system to refocus on prevention, primary care,  
7 and community-based management. Such interventions will need to be built on a strong foundation of integrated  
8 care.  
9

10  
11 In 2012, the Ministry of Health (MOH) Singapore launched a major initiative to reorganize healthcare at the  
12 national level into six clusters or Regional Health Systems (RHS) to foster care integration<sup>15</sup>. This was recently  
13 reorganized in 2017, into three integrated clusters to better meet future healthcare needs<sup>16</sup>. Every RHS  
14 comprises of a network each led by a major public hospital working in close partnership with health care  
15 providers (primary care providers, community hospitals, nursing homes, home care and day rehabilitation  
16 providers) and social care providers (including Senior Activity Centers, Grassroots organizations and Social  
17 Service Offices) within the same geographical region. Each RHS has the mandate and funding support to  
18 design and implement integrated care programs that leverage this network to provide healthcare beyond the  
19 hospital to the community, value-driven healthcare and holistic care across the entire care continuum in a cost-  
20 effective way<sup>17</sup>. To support this common vision, every RHS was tasked to implement programs identified by the  
21 MOH to be of priority and held accountable for same outcomes jointly agreed on between the MOH and the  
22 RHSes throughout the country. Following this lead, each RHS implemented the priority programs tailored to the  
23 unique needs and demographic of the population in which it serves as well as the different strengths of  
24 community partners within its network. Other programs unique to respective RHS were also developed and  
25 implemented accordingly.  
26  
27

28  
29 In this study, we propose to take advantage of a unique opportunity to document and evaluate the formation and  
30 implementation of a multi-pillared regional integrated care network. This evaluation study began in June 2016 at  
31 the National University Hospital System (NUHS)- RHS, the RHS at the western part of Singapore. This study  
32 aims to examine how and for whom the NUHS-RHS, as an integrated care network, works from healthcare  
33 providers' and healthcare users' perspectives to improve healthcare utilization, health outcomes and care  
34 experiences as well as to reduce healthcare costs.  
35  
36

### 37 **Methods and Analysis**

38 Considering the developmental nature of the NUHS-RHS, this evaluation is designed primarily as a formative  
39 evaluation which incorporates outcome valuation principles<sup>18</sup>. Considering the developing nature of the NUHS-  
40 RHS and its constituent programs, the evaluation findings will be used to facilitate modifications to existing  
41 NUHS-RHS programs as well as to provide evidence to support the increased likelihood of future success.  
42  
43

44  
45 The evaluation will be conducted using a realist evaluation approach<sup>19</sup>, which seeks to test and refine the  
46 program theory while assessing whether and how the program succeeds in the local setting, in order to generate  
47 important insights not just for Singapore but for the wider field of integrated care research. Realist evaluation is  
48 increasingly applied to the evaluation of complex healthcare interventions as it seeks to provide a more explicit  
49 and in-depth understanding of what works, for whom and in what circumstances and has been recommended for  
50 the evaluation of integrated care interventions<sup>20 21</sup>. It is a theory-driven approach in which interventions are  
51 assumed to be based on theories but are also active, flexible to changes and embedded in a social reality that  
52 influences how the intervention is implemented and how various actors in that reality respond to it<sup>19</sup>. A realist  
53 program theory specifies not only which outcomes are linked to the intervention, but also what mechanisms  
54 generate the outcomes and what features of the context affect them. The context-mechanism-outcome (CMO)  
55 configuration is used as the main structure for analysis, with the goal of identifying both mechanisms (what and  
56 how components of interventions result in changes) and contextual factors (features of the conditions which  
57 influence the mechanisms of interventions) are associated with variation in outcomes<sup>22 23</sup>. Pawson and Tilley  
58  
59

60 [Manuscript] Realist Evaluation of a Complex Integrated Care Program: a Study Protocol

1  
2 argue that an intervention can only achieve successful outcomes if the appropriate ideas are applied to the right  
3 context with appropriate social and cultural conditions<sup>22</sup>. A realist evaluation therefore includes a theory-driven  
4 formative evaluation<sup>24</sup>, process evaluation<sup>25</sup> as well as outcomes evaluation, and avoids the rigorously  
5 successionist format of experimental design.  
6

7 This evaluation will be conducted in three research phases according to the framework for realist evaluation  
8 outlined by Pawson and Tilley (Figure 1)<sup>22</sup>: 1. development of initial program theory underlying the NUHS-RHS;  
9 2. testing of program theory using empirical data; 3. refinement of initial program theory.  
10

### 11 **Phase 1: Development of Initial Program Theory (IPT)**

12 This evaluation began with first eliciting the IPT which subsequently formed the basis of the evaluation, focus the  
13 evaluation activities and determined the appropriate study design, data collection and analysis methods. First,  
14 program-related documents of the NUHS-RHS which describe the rationales, components of interventions and  
15 program protocols were reviewed to identify the underlying assumptions about how the respective programs are  
16 expected to work to achieve their intended outcomes. Ethnographic observations were then conducted to verify  
17 and obtain additional information to comprehensively describe the theory of change underlying the NUHS-RHS  
18 programs.  
19

20 Subsequently, key stakeholders involved in the planning, development and implementation of the NUHS-RHS  
21 programs were engaged through group discussions to identify: (i) factors which influence the implementation of  
22 the programs, (ii) initial observations on how and for whom the programs work, (iii) objectives of evaluation and  
23 (iv) outcomes which are relevant to the stakeholders. In collaboration with the RHS strategic planning office, a  
24 logic model (Figure 2), a tool that describes logical linkages among program resources, activities, and intended  
25 outputs, audiences, and short-, intermediate-, and long-term outcomes<sup>26</sup> related to the establishment of NUHS-  
26 RHS was drafted to depict IPT underlying the NUHS-RHS. To ensure the accuracy of the IPT, the logic model  
27 was circulated to stakeholders who were previously engaged for further inputs. After which, refinement to the IPT  
28 was made.  
29

30 As illustrated under activities on Figure 2, programs (P1-6) describes the MOH priority programs implemented  
31 nationally. The NUHS-RHS Integrated Interventions and Care Extension (P1) program aims to help patients with  
32 complex conditions who were admitted at least three or more times a year through a holistic case management.  
33 NUHS Transition Care Program (P2) was implemented to enable patients to transit smoothly from hospital to  
34 homes through a multidisciplinary team to ensure continuity of care. Appropriate Sitting of Care (P3 and P4)  
35 aims to ensure appropriate sitting of patients who are medically stable and deemed to not required specialist  
36 care from acute hospital to the community through partnership with primary and community care providers.  
37 Health Promotion and Disease Management (P5) focuses on health education, early detection of chronic  
38 diseases and timely interventions to prevent development of chronic illnesses as well as slow down the  
39 deterioration of diseases. Strengthening of primary and community care within the NUHS-RHS (P6) is achieved  
40 through cross deployment of skilled manpower from the acute hospital to the partnering primary and community  
41 care providers so as to improve the capability and confidence of the partners of the NUHS-RHS. Leveraging on  
42 tele-health and IT enablers, the Carehub aims to provide a single point of contact through individual's continuum  
43 of care post hospital discharge. The Primary Care Network (PCN) brings together a group of family physicians  
44 and community partners to create a support network for patients with chronic medical conditions in the  
45 community<sup>27</sup>.  
46

### 47 **Phase 2: Testing of Program Theory using Empirical Data**

#### 48 ***Prioritization of NUHS-RHS Programs for Testing of Program Theory***

49 As the number of programs undertaken under the purview of the NUHS-RHS is large, programs were selected  
50 for the testing of the IPT in consultation with stakeholders including healthcare providers and administrators,  
51 based on: (i) maturity of program, (ii) urgency for evaluation, (iii) complexity of programs and (iv) scientific  
52 importance.  
53

54 [Manuscript] Realist Evaluation of a Complex Integrated Care Program: a Study Protocol  
55  
56  
57  
58  
59  
60

1  
2  
3 Program maturity was assessed based on the duration of program implementation. A program that had been  
4 implemented for a longer duration was considered to be more mature and given higher priority than one which was  
5 recently implemented. Programs nearing the end of their funding period were also given higher priority for  
6 evaluation, as evaluation was essential to inform the future development of the program. Complexity was  
7 determined by assessing the number of dimensions of integrated care as defined previously (clinical,  
8 professional, organizational, systematic, normative and functional integration)<sup>3</sup>. A program that set out to  
9 integrate care in more dimensions was considered to be more complex than one which integrated care in fewer  
10 dimensions.  
11

12  
13 Finally, scientific importance was examined by a knowledge gap analysis conducted by reviewing available  
14 published articles relevant to these programs on PubMed. A program with the least number of relevant articles  
15 was considered to be of greatest scientific importance. According to these criteria, MN and HJMV ranked various  
16 NUHS-RHS programs as low, medium and high priority for evaluation. Through the priority-setting process, four  
17 programs (P1, P2, P3 and P4) were identified to be the best candidate programs for evaluation.  
18  
19

### 20 **Study Participants**

21 Two distinct groups of study participants – healthcare providers/managers and healthcare users – are selected  
22 based on defined criteria in this study. Healthcare providers/managers who are a part of the governance,  
23 planning and implementation of the programs are invited to take part in structured interviews and to complete the  
24 online Rainbow Model of Integrated Care (RMIC) survey<sup>28</sup>, while healthcare users, including patients or proxies  
25 (caregivers), are invited for structured interviews or prospective surveys over three time points. Interactions  
26 between healthcare providers and healthcare users will be observed  
27  
28

### 29 **Study Design**

30 Given the complexity of integrated care programs being evaluated and a range of perspectives in which this  
31 study tries to capture, a convergent parallel mixed methods study will be undertaken to test the IPT developed in  
32 phase 1. Using the convergent parallel strategy, both quantitative and qualitative data will be collected  
33 concurrently. Components will be given equal weight and two datasets will be analyzed, compared and merged  
34 through iterative cycles of validation and confirmation of findings<sup>29</sup>.  
35  
36

### 37 **Evaluation of implementation, context and mechanisms**

38 Implementation fidelity, context and mechanisms that underpin the NUHS-RHS as a whole will be  
39 assessed according to the modified version of the Conceptual Framework of Implementation Fidelity (CFIF)<sup>30</sup>.  
40 The CFIF provides a framework to assess content, frequency and dose of program implementation and the  
41 moderating factors affecting implementation fidelity of complex interventions. Moderating factors including  
42 participants' responsiveness, intervention complexity, comprehensiveness of policy description, strategies to  
43 facilitate implementation, quality of delivery, recruitment and context will be assessed. Data will be gathered  
44 through reviews of program documents, medical records, structured interviews healthcare providers and  
45 observations of actual delivery of interventions as described in Table 1.  
46  
47

48 Program documents including guidelines and databases will be reviewed by evaluators. Program guidelines will  
49 be examined to provide an understanding of the planned activities for each program and the proposed  
50 mechanisms of achieving targeted outcomes. The number of eligible patients referred, response rate, reasons  
51 for non-enrolment into the programs, frequency of program delivery as well as duration of enrolment will be  
52 retrieved from the existing program databases to determine the coverage, frequency and duration of respective  
53 programs. Furthermore, medical records of patients enrolled into the programs will be reviewed to provide a  
54 comprehensive picture of interactions between healthcare providers' and users throughout a patient's healthcare  
55 journey from enrolment to discharge. Medical records will be proportionately sampled based on the number of  
56 healthcare providers that are able to provide referrals within each program and the time point at which patients  
57 are enrolled into the programs.  
58  
59

60 [Manuscript] Realist Evaluation of a Complex Integrated Care Program: a Study Protocol

Healthcare providers (physicians, nurses, and other allied health professionals), and healthcare managers (care coordinators and healthcare administrators) who are involved in the planning, development and implementation of the four programs are invited to participate in face-to-face structured interviews. Written informed consent and demographic information including their age, gender, duration of involvement and roles will be collected prior to the interviews. Guided by the CFIF, content of interventions and moderating factors, which may have contributed or hampered the implementation of the interventions, will be assessed during interviews. All interviews will be audio-recorded, transcribed verbatim and coded thematically.

Two sessions of ethnographic observations (induction and follow up) for each study participant will be randomly conducted at patients' homes and/or through phone calls depending on where and how the interventions are provided. We expect to observe two sessions each for approximately 30 participants from each program and informed consent will be obtained from participants. Content of care delivery, interactions between healthcare professionals and users together patients' responses to the service will be observed. For each session, field notes will be taken, findings will be written in narratives and analyzed thematically.

#### *Data Analysis*

Data from the various sources will be given equal weightage and will subsequently be integrated at data analysis stage guided by the modified version of the CFIF using the triangulation protocol methodology<sup>31</sup>. The extent of which the intervention components were implemented will be rated on a 5-points Likert scale ranging from never to always by two independent evaluators. Potential moderating factors which affect the implementation of the programs will be assessed by examining participant responsiveness, comprehensiveness of protocols/guidelines, support available to facilitate recruitment and implementation, quality of service delivery and context (patient, professionals, organizational, political and economic factors). Analysis will also take into account other emergent themes not defined by the CFIF.

Table 1: Evaluation of implementation fidelity, context and mechanism underlying NUHS-RHS programs

|                    | <b>Specific component</b>               | <b>Data sources</b>                                                                                                                  |
|--------------------|-----------------------------------------|--------------------------------------------------------------------------------------------------------------------------------------|
| Adherence          | Content                                 | Ethnographic observation, medical records review and interview with program team members                                             |
|                    | Frequency / duration                    | Medical records review, interview with program team members and healthcare users                                                     |
|                    | Coverage                                | Program databases, interview with program team members                                                                               |
| Moderating factors | Participant responsiveness              | Ethnographic observation, interview with program team members and healthcare users and possibly medical records review (if recorded) |
|                    | Intervention complexity                 | Program documents (protocols, guidelines)                                                                                            |
|                    | Comprehensiveness of policy description | Program documents (protocols, guidelines)                                                                                            |
|                    | Strategies to facilitate implementation | Interview with program team members                                                                                                  |
|                    | Quality of delivery                     | Interview with healthcare users                                                                                                      |
|                    | Recruitment                             | Program database, interview with program team members                                                                                |
|                    | Context                                 | Interview with program team members                                                                                                  |

## **Evaluation of outcomes**

### **Healthcare utilization and health outcomes**

Healthcare utilization, health outcomes and patient-reported experiences and outcomes associated with the NUHS-RHS programs will be assessed through review of clinical indicators, structured interviews and administration of surveys as described below, to identify alignment with the Chronic Care Model (CCM)<sup>32</sup>. The CCM identifies the community, the health system, self-management support, delivery system design, decision support and clinical information systems as key elements of a health system that are essential to provide good quality chronic care<sup>32</sup>.

The effect of the program on healthcare utilization will be measured by analyzing the number of admissions, Emergency Department (ED) attendance, number of specialist outpatient clinic (SOC) attendances, average bed days, for patients enrolled from the start of the programs. To capture the potentially evolving nature of the programs and their effects, data will be collected over various time points with respect to their respective date of enrollment program— 12 months before (T-12), 9 months before (T-9), 6 months before (T-6), 3 months before (T-3), date of enrolment (T0), 3 months after (T3), 6 months after (T6), 9 months after (T9), 12 months after (T12) and 15 months after (T15). Demographic data (gender, age, race, comorbidity and socio-economic status) will also be retrieved for all patients.

Clinical indicators at various time points for all patients who are enrolled and decline will be extracted from the existing NUHS-RHS databases. In reference to the point of patients' enrolment into the programs, clinical indicators at T-12, T-9, T-6, T-3, T0, T3, T6, T9, T12 and T15 will be extracted. In addition, the 8-item Morisky Medication Adherence Scale (MMAS-8) will be used to assess patients' compliance to prescribed medications<sup>33</sup>. The MMAS-8 is a structured self-report measure of medication-taking behaviour that has been widely used in various cultures and is considered a gold standard of measurement<sup>34</sup>.

The effect of the programs on patient-reported outcomes, patients' quality of life, care experience and self-efficacy will be assessed using validated survey instruments over three time points, at the starting point, mid-way and the end of the program. Quality of life of patients will be assessed using the EuroQoL- 5 Dimension (EQ-5D) instrument. The EQ-5D consists of 5 items, which recognizes the fundamental importance of independent physical, emotional and social functioning, as part of a more holistic view of health. It has been validated in Singapore and is a common measure used to assess quality of life as the result of healthcare interventions<sup>35</sup>. Patients' perception of the quality of care received will be examined using the Patient Assessment of Care for Chronic Conditions (PACIC)<sup>36</sup>. The PACIC seeks to understand the frequency with which various aspects of care patients with chronic conditions received from their healthcare providers aligned with components of the Chronic Care Model (CCM). The healthcare providers include regular doctors, nurse, care coordinators, allied health providers and others. PACIC has been widely validated and used at various healthcare settings across the world<sup>37-40</sup>.

Patients' experience of care continuity will be assessed using the CCAENA (Continuity of care between care levels) questionnaire. The CCAENA consists of 29 items and assesses continuity of care across different levels from the patients' perspectives<sup>41</sup>. The components covered by the CCAENA include the relationships between patient and primary care providers, and between specialists and primary care providers. Finally, self-efficacy is



1  
2 measured using the Patient Activation Measure (PAM), which consists of 13 items will be used to measure  
3 patient knowledge, skill, and confidence for self-management<sup>42</sup>.  
4

5 Complementary to the quantitative analysis of outcomes, a more in-depth understanding of healthcare users'  
6 perception of healthcare quality, including why and how it has worked, or did not work, will be explored  
7 qualitatively through interviews with healthcare users. Healthcare users including patients and their family  
8 members who have had experiences with the programs for at least 3 months are invited to take part in face to  
9 face interviews. Interviews are structured according to the program logic model, and key components of the  
10 Chronic Care Model (CCM)<sup>32</sup>. Perception of the level of care integration as well as recommendations for  
11 improvement to the programs will also be elicited during the interviews. Potential participants will be recruited  
12 through care coordinators and will be screened against the selection criteria by the study team prior to the  
13 interviews. Only those who are eligible and are willing to be audio recorded will be interviewed. Written informed  
14 consent and demographic information will be attained from the participants before proceeding with the  
15 interviews. Interviews will be conducted in English, Chinese or Malay at the patients' homes or at NUHS. Notes  
16 will be taken during observations and all interviews are audio recorded, transcribed verbatim and will be  
17 imported to Atlas.ti 7.0 for analysis.  
18  
19

### 20 21 *Data-analysis*

22 An interrupted time series analysis (ITSA) will be conducted for all programs to examine the effects of the  
23 NUHS-RHS programs on healthcare utilization, health outcomes and care experiences. In addition, difference in  
24 difference (DID) analysis will be conducted for those with comparison groups<sup>43 44</sup>. Proposed to be more flexible  
25 compared to the traditional randomized controlled trials analysis, ITSA is conducted to estimate the changes  
26 associated with the introduction of interventions over time. To estimate changes in the above outcomes, time  
27 series regression that includes data from patients enrolled into the programs 1 year prior to and after referral to  
28 the programs will also be run. The model will have 3 main parameters: 1. Estimation of the annual trend in  
29 healthcare utilisation (i.e. hospital admission, SOC attendances, ED attendances and average bed days) and  
30 clinical indicators one year before until the introduction of the programs 2. Estimation of changes in all outcomes  
31 associated with introduction of the programs; 3. The trend change in outcomes associated with each year. For  
32 each outcome, we will apply a generalized estimating equation model clustering by the combination of age, sex,  
33 and comorbidity score with robust standard errors and an autoregressive correlation matrix. We will report rate  
34 ratios (RRs) calculated from the parameter estimations, which represent population-averaged rates. DID  
35 analysis will subsequently be performed to estimate the impact of the programs by comparing differential effects  
36 in the outcomes between intervention and comparison groups. Sensitivity analyses will be performed and  
37 confounding effects will be accounted for.  
38  
39  
40

41 Observation notes and interview transcripts will be thematically coded by two independent researchers using a  
42 two-steps according to the integrated approach as described by Bradley et al<sup>45</sup>. We have selected this  
43 approach as this study adopts an existing CCM framework, but we would like to ensure completeness of findings  
44 by assuring other emergent themes not previously described in the CCM are also considered. The first step  
45 consists of a deductive analysis, where units of data are coded according to the CCM. This will be followed by an  
46 inductive analysis, where new themes or unexpected findings are elicited through coding and categorizing. If the  
47 interviews were conducted in other languages beside English, these will be transcribed and the analysis will be  
48 conducted by a researcher that is fluent in that language. The relevant quotes representative of the analysis will  
49 then be translated into English. Subsequently, data collected through prospective surveys and interviews with  
50 healthcare users will be merged using the CCM as a framework.  
51  
52

### 53 *Care Integration*

54 The extent of care integration with the NUHS-RHS will be assessed through the administration of the RMIC  
55 measurement tool (MT) adapted to Singapore<sup>28 46</sup>. Tested and validated in Singapore, the RMIC-MT was  
56 developed to measure the extent of care integration from the healthcare providers' perspectives. It consists of 62  
57 items grouped into eight factors of integrated care related to person-focused and population-based care, clinical  
58  
59

1  
2 integration, professional, organizational, systematic, functional and normative integration. The RMIC-MT uses a  
3 four point Likert scale ranging from “never” to “all the time” and an additional option of “not sure/don’t know”<sup>28</sup>.

#### 4 5 *Data-analysis*

6 Incomplete RMIC-MT will be excluded from analysis. The “not sure/don’t know” option will be considered as  
7 missing data and will be imputed with median score of each item. The RMIC-MT will be scored as described  
8 previously by Nurjono et al. in which the average score for respective dimensions of RMIC and overall care  
9 integration will be computed. A higher score on the RMIC-MT is considered to reflect a greater extent of care  
10 integration. The RMC was developed through a systematic literature review and validated by international Delphi  
11 panels.<sup>3</sup> It describes six dimensions of care integration (clinical, professional, organizational, functional and  
12 normative integration) across different levels within a health system needed to provide a continuous,  
13 comprehensive and coordinated delivery of services to the individual and population. Furthermore, the degree of  
14 integrated care within NUHS will be compared to the degree of integrated care in other health systems  
15 (Netherlands and Australia) in which the RMIC-MT has been administered.  
16  
17

#### 18 19 **Healthcare cost**

20 To examine the effect of NUHS-RHS programs on healthcare costs, six categories of costs including (i)  
21 development costs (ii) program implementation costs (iii) healthcare utilisation costs (inpatient, outpatient and  
22 community) (iv) productivity costs incurred to patients and/or caregivers (v) travel costs borne by patients for  
23 travelling to receive care and (vi) caregiving cost will be collected<sup>47</sup>. Cost categories (i), (ii), (iii) are considered  
24 related to the healthcare system whereas categories (iv)-(vi) take into account costs from the societal  
25 perspective.  
26

27  
28 Development costs include costs incurred during the development of the NUHS-RHS and their respective  
29 programs. The program implementation costs take into account costs related to the implementation of the  
30 programs including the manpower costs, travel costs, costs of equipment, and costs of materials used for patient  
31 and caregiver training and costs associated with multidisciplinary team meetings. The development and  
32 implementation costs will be systematically collected using WHO’s CostIt instrument<sup>48</sup> and will be divided by the  
33 number of clients included into the programs to obtain per patient cost.  
34

35 The cost of healthcare utilisations (hospital inpatient, outpatient services, primary and community care services),  
36 productivity costs (estimated based on absence from paid employment due to illness or providing care), travel  
37 costs (distance to healthcare providers and expenses incurred related to providing care to enrolled patients) and  
38 caregiving costs (cost related to the hire of domestic helpers, costs related to improvement in home environment  
39 and costs of caregiver training) will be collected using routinely collected hospitals data and a cost questionnaire  
40 administered to participants at T0 and T12 where each participant will be asked to recall his/her expenses 3  
41 months prior to the time of the interview.  
42  
43

#### 44 45 *Data-analysis*

46 Differences in costs by category before and after enrollment will be analyzed using paired Wilcoxon tests. The  
47 difference will be considered statistically significant if the p-value < 0.05. Paired analysis will be adjusted by age,  
48 gender and number of co-morbidities at baseline. To estimate the cost-effectiveness of the right-site care  
49 programs, an incremental cost-effectiveness ratio (ICER) will be computed using changes in Quality-adjusted life  
50 years (QALYs) attributable to the program as the primary measure of program effectiveness, divided by changes  
51 in costs costs measured both from the health system and societal perspectives. The program will be considered  
52 cost effective if the ICER is lower than Singapore-specific thresholds. Currently, in the absence of a formal  
53 nationally-accepted threshold for societal costs, we will adapt a default threshold consistent with WHO CHOICE  
54 benchmarks of approximately \$60-75000 per QALY<sup>49</sup> The appropriate cost-effectiveness thresholds will be  
55 reviewed and updated to be consistent with national best practice at the time of completion of the analysis.  
56  
57

#### 58 59 **Phase 3: Refinement of Initial Program Theory**

60 [Manuscript] Realist Evaluation of a Complex Integrated Care Program: a Study Protocol

1  
2 Finally, to provide an overall evaluation of the NUHS-RHS taking into consideration various perspectives,  
3 qualitative and quantitative data obtained from various stakeholders including the program team members and  
4 patients/proxies will be integrated through the process of triangulation at the data interpretation stage when both  
5 quantitative and qualitative data have been analysed separately<sup>31</sup>. The triangulation protocol will be adopted to  
6 guide data integration by first producing a convergence coding matrix according to the guiding conceptual  
7 frameworks to display findings emerging from each component followed by consideration of where there is  
8 agreement, partial agreement, silence or dissonance between findings from different data sources. Assessment  
9 of the fit of data integration will be conducted by examining the coherence of findings from various methods  
10 used, as suggested by Fetters et al<sup>50</sup>. Data on context, mechanisms and outcomes will be gathered and  
11 analyzed guided by respective frameworks as described in phase 2. These will then be linked according to the  
12 realist evaluation CMO formula in which findings on context and mechanisms will be used to explain outcomes  
13 observed. A few potential CMO configurations will then be proposed and discussed (for validation purposes)  
14 through 2-3 focus group discussions comprising of 8-10 different stakeholders each. After which, the initial  
15 program theory will be refined to highlight how to improve the NUHS-RHS by detailing what works (outcome),  
16 as well as how (mechanisms) and under what conditions (context).  
17  
18  
19  
20

### 21 **Ethics and dissemination**

22 Data collection for this study was started in June 2016 and is expected to continue until June 2019. The National  
23 Healthcare Group, Singapore, Domain Specific Review Board reviewed and approved this study protocol Board  
24 (DSRB Ref: 2016/00410 and 2016/00914). Written informed consent forms are obtained from participants  
25 (healthcare providers and users) included for interviews and surveys. To maintain confidentiality of the research  
26 participants, identifiable information obtained from research participants are kept securely under password  
27 protection. A unique respondent identification is assigned to each study participant so that data can be  
28 processed anonymously. Waiver of informed consent was obtained for analysis of retrospective data collected  
29 as part of the hospital and Ministry of Health (MOH) routine data collection and no identifiable data are known by  
30 the researchers. Study results will be written up and published in international peer reviewed journals and will be  
31 presented at national, international conferences and internally at NUHS-RHS and the MOH, Singapore  
32  
33  
34

### 35 **Mitigation of Potential Risks and Limitations**

36 While realist evaluation approach and mixed methods design have been advocated for the evaluation of  
37 complex healthcare interventions, they are relatively new in comparison to the RCTs commonly used in the  
38 evaluation of medical interventions. Due to the lack of familiarity on the use of realist evaluation and mixed  
39 methods in the field of health and healthcare research, this study design may draw criticism for not being as  
40 rigorous as the typical RCT. Furthermore, we acknowledge that the use of mixed methods design also increases  
41 complexity. Nonetheless, we strive to reach optimal integration of data at multiple levels – study design,  
42 methods, interpretation and reporting – using the convergent parallel mixed methods approach which connects  
43 and merges methods and findings.  
44  
45

46 Furthermore, as participation in the evaluation efforts is voluntary and only individuals who are able or have  
47 proxies who are able to provide informed consent are included in this evaluation effort, we also recognize that  
48 selection bias may be introduced in this study. To account for selection bias, demographic information including  
49 age, gender, ethnicity and role (for healthcare providers) are collected and will be compared between  
50 responders and non-responders. Given the prospective nature of some of our data collection methods,  
51 difficulties in following up with respondents are also anticipated. To minimize the numbers lost to follow up,  
52 research appointments are scheduled at participants' time and place of convenience in collaboration with  
53 participants' care coordinators. In the event when loss to follow is inevitable due to death, survival analysis will  
54 be conducted to account for the missing data.  
55  
56

57 In addition, it must be acknowledged that as much as it was intended for the delivery of care to be consistent,  
58 variability in the extent of how care was provided exists, especially across different disease specific subprograms

59 [Manuscript] Realist Evaluation of a Complex Integrated Care Program: a Study Protocol  
60

1  
2 and also within individual sub-program. To account for such variability, subgroup analysis will be conducted and  
3 adjustments based on the number of care providers within a subprogram will also be made.  
4

## 5 **Discussion**

6 Singapore is in the early phase of developing new integrated care models. Notwithstanding the scope of more  
7 general design principles of integrated care, development and implementation of integrated care requires  
8 adaptation to the context, needs of the local population and the capacity and capability of local healthcare  
9 providers. To the best of our knowledge, this study provides the first opportunity to holistically evaluate the  
10 NUHS-RHS, and one of the first to conduct a comprehensive evaluation of a new integrated care network in the  
11 context of South-East Asia using a realist evaluation approach.  
12  
13

14 This study carries significant implications for the health system and society in Singapore as well as for the field of  
15 integrated care internationally. By ensuring the rigor of this evaluation and adopting a realist approach, findings  
16 from this study are expected to generate contextually relevant evidence for improving efficiency and  
17 effectiveness of the NUHS-RHS as it develops and also to inform future initiatives of the NUHS. It is also  
18 expected to yield policy-relevant insights for national-level decision makers as they continue to monitor and  
19 refine the RHS model for Singapore over the coming years. In designing this evaluation, stakeholders including  
20 program team members, healthcare managers and policymakers were engaged to help evaluators understand  
21 the context in which the programs were implemented, how interventions have been delivered, to define  
22 objectives, evaluation questions and outcomes which are relevant to the stakeholders and to identify constraints  
23 to the feasibility of implementation of the evaluation itself. Various potential pitfalls in evaluation design and  
24 implementation have been collectively identified and risk management strategies put into place wherever  
25 possible. This provides confidence that the evaluation efforts are rigorous, relevant and has the potential to  
26 provide insights for program improvement as well as provide evidence to support policy decisions to scale-  
27 up/down activities within NUHS. Engagement of stakeholders early in the evaluation efforts is also expected to  
28 increase the likelihood that recommendations will be adopted to improve the relevant components of the existing  
29 care models and define future new care models. On the other hand, the involvement of stakeholders may exert  
30 pressure to act on preliminary findings. Understanding these dynamics will also be of interest as part of the  
31 evaluation itself.  
32  
33  
34  
35

36 Like NUHS, other integrated care networks within Singapore and abroad are experimenting with new integrated  
37 care models. However, the findings from existing research of the (cost-)effectiveness of integrated care are to a  
38 major extent inconsistent because of the variations in the strategic outcomes, methods of implementation,  
39 contexts (i.e. system and policy) and/or applied evaluation measures. Examples include next generation  
40 accountable care organisations in the United States <sup>51</sup>, integrated care pioneers and vanguard sites in England  
41 <sup>52 53</sup>, population health management pilots in the Netherlands <sup>54</sup>, integrated care pilots in Belgium <sup>55</sup> and  
42 theintegrated care demonstrators in Australia <sup>56</sup>. This study provides an opportunity to fill some of the gaps in  
43 current research by evaluating the NUHS-RHS and its constituent programs using a rigorous and  
44 comprehensive design that balances the needs of context-specific evaluation with international comparability.  
45 Wherever possible, steps such as using internationally validated instruments for evaluation of chronic disease  
46 are taken, to allow for meaningful international comparisons that can increase collective knowledge about the  
47 restructuring of chronic care models towards advancing integrated care.  
48  
49  
50  
51  
52  
53  
54  
55  
56  
57  
58  
59  
60

**References:**

1. World Health Organization. WHO global strategy on people-centred and integrated health services- interim report 2015.
2. Starfield B. Is Patient-Centered Care the Same As Person-Focused Care? *The Permanente Journal* 2011;15(2):63-69.
3. Valentijn PP, Schepman SM, Opheij W, et al. Understanding integrated care: a comprehensive conceptual framework based on the integrative functions of primary care. *International Journal of Integrated Care* 2013;13:e010.
4. World Health Organization. Integrated Health Services - What and Why? . Geneva, 2008.
5. Suter E, Oelke ND, Adair CE, et al. Ten Key Principles for Successful Health Systems Integration. *Healthcare quarterly (Toronto, Ont)* 2009;13(Spec No):16-23.
6. Minkman MMN. Developing integrated care. Towards a development model for integrated care. *International Journal of Integrated Care* 2012;12:e197.
7. van der Klauw D, Molema H, Grooten L, et al. Identification of mechanisms enabling integrated care for patients with chronic diseases: a literature review. *International Journal of Integrated Care* 2014;14(3) doi: <http://doi.org/10.5334/ijic.1127>
8. Goodwin N. Understanding and Evaluating the Implementation of Integrated Care: A 'Three Pipe' Problem. *International Journal of Integrated Care* 2016;16(4):19. doi: 10.5334/ijic.2609
9. Greenhalgh T, Robert G, Macfarlane F, et al. Diffusion of Innovations in Service Organizations: Systematic Review and Recommendations. *The Milbank Quarterly* 2004;82(4):581-629. doi: 10.1111/j.0887-378X.2004.00325.x
10. Craig P, Dieppe P, Macintyre S, et al. Developing and evaluating complex interventions: the new Medical Research Council guidance. *BMJ* 2008;337 doi: 10.1136/bmj.a1655
11. Moore GF, Audrey S, Barker M, et al. Process evaluation of complex interventions: Medical Research Council guidance. *BMJ : British Medical Journal* 2015;350 doi: 10.1136/bmj.h1258
12. Ministry of Health Singapore. STATE OF HEALTH Report of the Director of Medical Services 2003-2012. Singapore
13. Evans J, Baker G, Berta W, et al. The evolution of integrated health care strategies. *Advances in Health Care Management* 2013;15:125-61.
14. Bloomberg. Bloomberg Best (And Worst): Most Efficient Healthcare 2014: Countries 2017 [Available from: <https://www.bloomberg.com/graphics/best-and-worst/#most-efficient-health-care-2014-countries2017>.
15. Ministry of Health. Healthcare 2020: Improving Accessibility, Quality & Affordability 2012.
16. Ministry of Health S. Reorganisation of healthcare system into three integrated clusters to better meet future healthcare needs 2017 [Available from: [https://www.moh.gov.sg/content/moh\\_web/home/pressRoom/pressRoomItemRelease/2017/reorganisation-of-healthcare-system-into-three-integrated-cluste.html](https://www.moh.gov.sg/content/moh_web/home/pressRoom/pressRoomItemRelease/2017/reorganisation-of-healthcare-system-into-three-integrated-cluste.html) accessed 01 March 2017.

- 1  
2  
3  
4  
5  
6  
7  
8  
9  
10  
11  
12  
13  
14  
15  
16  
17  
18  
19  
20  
21  
22  
23  
24  
25  
26  
27  
28  
29  
30  
31  
32  
33  
34  
35  
36  
37  
38  
39  
40  
41  
42  
43  
44  
45
17. Ministry of Health Singapore. Speech by Minister for Health, Mr Gan Kim Yong, at the MOH Committee of Supply Debate 2016 [Available from: [https://www.moh.gov.sg/content/moh\\_web/home/pressRoom/speeches\\_d/2016/speech-by-minister-fo-health--mr-gan-kim-yong--at-the-moh-commit.html2017](https://www.moh.gov.sg/content/moh_web/home/pressRoom/speeches_d/2016/speech-by-minister-fo-health--mr-gan-kim-yong--at-the-moh-commit.html2017)].
  18. CDC. Types of Evaluation 2017 [Available from: <https://www.cdc.gov/std/Program/pupestd/Types%20of%20Evaluation.pdf2017>].
  19. Pawson R, Tilley N. Realistic Evaluation. London SAGE 1997.
  20. Salter KL, Kothari A. Using realist evaluation to open the black box of knowledge translation: a state-of-the-art review. *Implementation Science : IS* 2014;9:115. doi: 10.1186/s13012-014-0115-y
  21. Byng R, Norman I, Redfern S. Using Realistic Evaluation to Evaluate a Practice-level Intervention to Improve Primary Healthcare for Patients with Long-term Mental Illness. *Evaluation* 2005;11(1):69-93. doi: 10.1177/1356389005053198
  22. Pawson R, Tilley N. Realist Evaluation 2004
  23. Berwick DM. The science of improvement. *JAMA* 2008;299(10):1182-84. doi: 10.1001/jama.299.10.1182
  24. Parry GJ, Carson-Stevens A, Luff DF, et al. Recommendations for Evaluation of Health Care Improvement Initiatives. *Academic Pediatrics* 2013;13(6, Supplement):S23-S30. doi: <http://dx.doi.org/10.1016/j.acap.2013.04.007>
  25. Craig P, Dieppe P, Macintyre S, et al. Developing and evaluating complex interventions: the new Medical Research Council guidance. *The BMJ* 2008;337:a1655. doi: 10.1136/bmj.a1655
  26. McCawley P. The Logic Model for Program Planning and Evaluation University of Idaho Extension; [Available from: <https://www.cdc.gov/std/Program/pupestd/Components%20of%20a%20Logic%20Model.pdf>].
  27. System NUH. Regional Health System - Our Programmes [Available from: <http://www.nuhs.edu.sg/regional-health-system/programmes.html2016>].
  28. Nurjono M, Valentijn PP, Bautista MAC, et al. Psychometric Validation of Rainbow Model of Integrated Care Measurement Tool (RMIC-MT) within Singapore's Regional Health Systems [Submitted for publication] 2016
  29. Curry LA, Krumholz HM, O'Cathain A, et al. Mixed Methods in Biomedical and Health Services Research. *Circulation Cardiovascular quality and outcomes* 2013;6(1):119-23. doi: 10.1161/CIRCOUTCOMES.112.967885
  30. Hasson H. Systematic evaluation of implementation fidelity of complex interventions in health and social care. *Implementation Science* 2010;5(1):67. doi: 10.1186/1748-5908-5-67
  31. O'Cathain A, Murphy E, Nicholl J. Three techniques for integrating data in mixed methods studies. *BMJ* 2010;341 doi: 10.1136/bmj.c4587
  32. Wagner E, Austin B, Davis C, et al. Improving Chronic Illness Care: Translating Evidence Into Action. *Health Affairs* 2001;20(6):64-78.
  33. Wang Y, Kong M. Psychometric properties of the 8-item Morisky Medication Adherence Scale in patients taking warfarin

#### 46 *Thrombosis and Haemostasis*

- 47  
48  
49  
50  
51  
52  
53  
54  
55  
56  
57  
58  
59
- 2012;108(4):589-800.
  34. Lam WY, Fresco P. Medication Adherence Measures: An Overview. *BioMed Research International* 2015;2015:217047. doi: 10.1155/2015/217047
  35. Wee H, Loke W, Li C, et al. Cross-Cultural Adaptation and Validation of Singapore Malay and Tamil Versions of the EQ-5D. *Annals of the Academy of Medicine, Singapore* 2007;36(6):403-8.
  36. Glasgow RE, Wagner EH, Schaefer J, et al. Development and Validation of the Patient Assessment of Chronic Illness Care (PACIC). *Medical Care* 2005;43(5):436-44.
  37. Krucien N, Le Vaillant M, Pelletier-Fleury N. Adaptation and validation of the patient assessment of chronic illness care in the French context. *BMC Health Services Research* 2014;14:269-69. doi: 10.1186/1472-6963-14-269

[Manuscript] Realist Evaluation of a Complex Integrated Care Program: a Study Protocol

- 1  
2  
3  
4  
5  
6  
7  
8  
9  
10  
11  
12  
13  
14  
15  
16  
17  
18  
19  
20  
21  
22  
23  
24  
25  
26  
27  
28  
29  
30  
31  
32  
33  
34  
35  
36  
37  
38  
39  
40  
41  
42  
43  
44  
45  
46  
47  
48  
49  
50  
51  
52  
53  
54  
55  
56  
57  
58  
59  
60
38. Cramm JM, Nieboer AP. Factorial validation of the patient assessment of chronic illness care (PACIC) and PACIC short version (PACIC-S) among cardiovascular disease patients in the Netherlands. *Health and Quality of Life Outcomes* 2012;10:104-04. doi: 10.1186/1477-7525-10-104
  39. Shah NR, Aragonés A, Schaefer EW, et al. Validation of the Spanish Translation of the Patient Assessment of Chronic Illness Care (PACIC) Survey. *Preventing Chronic Disease* 2008;5(4):A113.
  40. Liu L-J, Li Y, Sha K, et al. Patient Assessment of Chronic Illness Care, Glycemic Control and the Utilization of Community Health Care among the Patients with Type 2 Diabetes in Shanghai, China. *PLoS ONE* 2013;8(9):e73010. doi: 10.1371/journal.pone.0073010
  41. Aller M-B, Vargas I, Garcia-Subirats I, et al. A tool for assessing continuity of care across care levels: an extended psychometric validation of the CCAENA questionnaire. *International Journal of Integrated Care* 2013;13:e050.
  42. Hibbard JH, Mahoney ER, Stockard J, et al. Development and Testing of a Short Form of the Patient Activation Measure. *Health Services Research* 2005;40(6 Pt 1):1918-30. doi: 10.1111/j.1475-6773.2005.00438.x
  43. Linden A, Adams J, Roberts N. Evaluating Disease Management Program Effectiveness: An Introduction to Time Series Analysis *Disease Management* 2003;6(4):243-55.
  44. Kontopantelis E, Doran T, Springate DA, et al. Regression based quasi-experimental approach when randomisation is not an option: interrupted time series analysis. *The BMJ* 2015;350:h2750. doi: 10.1136/bmj.h2750
  45. Bradley EH, Curry LA, Devers KJ. Qualitative Data Analysis for Health Services Research: Developing Taxonomy, Themes, and Theory. *Health Services Research* 2007;42(4):1758-72. doi: 10.1111/j.1475-6773.2006.00684.x
  46. Nurjono M, Valentijn PP, Bautista MAC, et al. A Prospective Validation Study of a Rainbow Model of Integrated Care Measurement Tool in Singapore. *International Journal of Integrated Care* 2016;16(1):1. doi: 10.5334/ijic.2021
  47. Tsiachristas A. Payment and economic evaluation of integrated care. *International Journal of Integrated Care* 2015;15(2) doi: <http://doi.org/10.5334/ijic.2009>
  48. World Health Organization. CostIt [Available from: [http://www.who.int/choice/toolkit/cost\\_it/en/](http://www.who.int/choice/toolkit/cost_it/en/) accessed 16th March 2016.
  49. World Health Organization. Cost effectiveness and strategic planning (WHO-CHOICE) 2017 [Available from: [http://www.who.int/choice/costs/CER\\_levels/en/](http://www.who.int/choice/costs/CER_levels/en/) accessed 20 Dec 2016 2016.
  50. Fetters MD, Curry LA, Creswell JW. Achieving Integration in Mixed Methods Designs—Principles and Practices. *Health Services Research* 2013;48(6 Pt 2):2134-56. doi: 10.1111/1475-6773.12117
  51. Centres for Medicare & Medicaid Services. Next Generation ACO Model 2016 [Available from: <https://innovation.cms.gov/initiatives/Next-Generation-ACO-Model/> accessed 15 June 2016.
  52. England N. Integrated Care Pioneers 2016 [Available from: <https://www.england.nhs.uk/pioneers/> accessed 15 June 2016.
  53. England N. Health and high quality care for all, now and for future generations 2016 [Available from: <https://www.england.nhs.uk/ourwork/futurenhs/new-care-models/> accessed 15 June 2016.
  54. Kodner D. All together now: a conceptual exploration of integrated care *Healthcare Quarterly* 2009;13 Spec 6-15.
  55. GIDS. PILOOTPROJECTEN GEINTEGREERDE ZORG VOOR CHRONISCH ZIEKEN 2016 [Available from: [http://www.health.belgium.be/sites/default/files/uploads/fields/fpshealth\\_theme\\_file/gids\\_pilootprojecten\\_geintegreerde\\_zorg\\_voor\\_chronisch\\_zieken.pdf](http://www.health.belgium.be/sites/default/files/uploads/fields/fpshealth_theme_file/gids_pilootprojecten_geintegreerde_zorg_voor_chronisch_zieken.pdf) accessed 15 June 2016
  56. NSW Government. Integrated Care Demonstrators 2016 [Available from: <http://www.health.nsw.gov.au/wohp/Pages/demonstrators.aspx> accessed 15 June 2016.

## Funding

[Manuscript] Realist Evaluation of a Complex Integrated Care Program: a Study Protocol

1  
2 This study is funded by NUHS Research Office (Grant No: NUHSRO/2016/008/RO5+5/FY16CF/LOA) awarded  
3 to HJM Vrijhoef and taken over by Thomas Wee after HJM Vrijhoef changed positions.  
4  
5

### 6 **Authors' contributions**

7 SAT, TW and HJMV initiated the study and HJMV conceptualized the study. HJMV and MN designed and  
8 constructed the first draft of study protocol. ST, SHW, KMF, SAT, TW and JY reviewed study protocol and  
9 provided feedback for the refinement of the protocol. MN, PS, AL, XYL, ST, SHW and KMF are involved in data  
10 collection and MN, PS, XYL and FS will be involved in data analysis related to this study. MN wrote up the first  
11 draft and final version of the manuscript. All authors read, provided suggestions for revision and approved the  
12 final manuscript.  
13

### 14 **Acknowledgments**

15 We would like to thank Gerald Koh, Lim Yee Wei and Wee Hwee Lin for their advices for this study.  
16

### 17 **Data sharing statement**

18 For access to the data set, a formal request should be sent to the corresponding author. The request will only be  
19 considered when the primary results of the study have been published  
20

### 21 **Competing Interests**

22 ST, SHW, KMF, SAT and TW are a part of the NUHS-RHS strategic planning office which is involved in the  
23 planning and development of programs under the purview of the NUHS-RHS.  
24  
25  
26  
27  
28  
29  
30

### 31 **Figure legends**

32 Figure 1: Realist evaluation processes and research phases according to Pawson and Tilley

33  
34 Figure 2: Logic model of NUHS-RHS  
35  
36  
37  
38  
39  
40  
41  
42  
43  
44  
45  
46  
47  
48  
49  
50  
51  
52  
53  
54  
55  
56  
57  
58  
59  
60



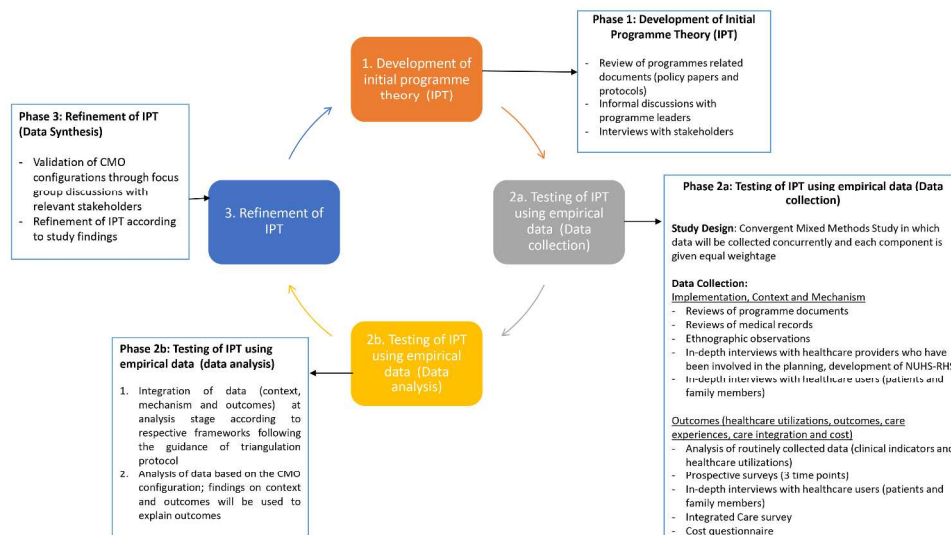

Figure 1: Realist evaluation processes and research phases according to Pawson and Tilley

338x190mm (300 x 300 DPI)

review only

1  
2  
3  
4  
5  
6  
7  
8  
9  
10  
11  
12  
13  
14  
15  
16  
17  
18  
19  
20  
21  
22  
23  
24  
25  
26  
27  
28  
29  
30  
31  
32  
33  
34  
35  
36  
37  
38  
39  
40  
41  
42  
43  
44  
45  
46  
47  
48  
49  
50  
51  
52  
53  
54  
55  
56  
57  
58  
59  
60

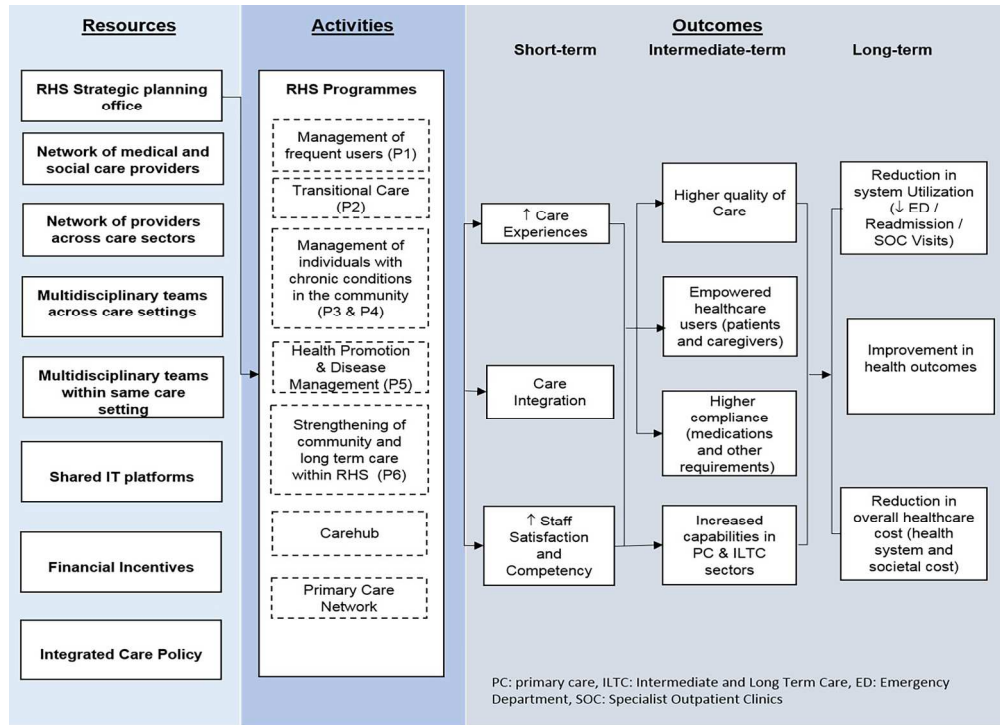

Figure 2: Logic model of NUHS-RHS

228x165mm (300 x 300 DPI)

ew only

# BMJ Open

## Realist evaluation of a complex integrated care program: protocol for a mixed methods study

|                                 |                                                                                                                                                                                                                                                                                                                                                                                                                                                                                                                                                                                                                                                                                                                                                                                                                                                                                                                                                                                                                                                                                                                                                                   |
|---------------------------------|-------------------------------------------------------------------------------------------------------------------------------------------------------------------------------------------------------------------------------------------------------------------------------------------------------------------------------------------------------------------------------------------------------------------------------------------------------------------------------------------------------------------------------------------------------------------------------------------------------------------------------------------------------------------------------------------------------------------------------------------------------------------------------------------------------------------------------------------------------------------------------------------------------------------------------------------------------------------------------------------------------------------------------------------------------------------------------------------------------------------------------------------------------------------|
| Journal:                        | <i>BMJ Open</i>                                                                                                                                                                                                                                                                                                                                                                                                                                                                                                                                                                                                                                                                                                                                                                                                                                                                                                                                                                                                                                                                                                                                                   |
| Manuscript ID                   | bmjopen-2017-017111.R2                                                                                                                                                                                                                                                                                                                                                                                                                                                                                                                                                                                                                                                                                                                                                                                                                                                                                                                                                                                                                                                                                                                                            |
| Article Type:                   | Protocol                                                                                                                                                                                                                                                                                                                                                                                                                                                                                                                                                                                                                                                                                                                                                                                                                                                                                                                                                                                                                                                                                                                                                          |
| Date Submitted by the Author:   | 24-Jul-2017                                                                                                                                                                                                                                                                                                                                                                                                                                                                                                                                                                                                                                                                                                                                                                                                                                                                                                                                                                                                                                                                                                                                                       |
| Complete List of Authors:       | Nurjono, Milawaty; National University of Singapore, Centre for Health Services Research and Policy Research, Saw Swee Hock School of Public Health<br>Shrestha, Pami ; National University Health System, Regional Health System Planning Office<br>Lee, Alice; National University Health System, Regional Health System Planning Office<br>Lim, Xin Ya; National University of Singapore, Saw Swee Hock School of Public Health<br>Shiraz, Farah ; National University of Singapore, Saw Swee Hock School of Public Health<br>Tan, Shermin ; National University Health System, Regional Health System Planning Office<br>Wong, Shing Hei Thomas ; National University Health System, Regional Health System Planning Office<br>Foo, Kah Mun ; National University Health System, Regional Health System Planning Office<br>Wee, Thomas ; National University Health System, Regional Health System Planning Office<br>Toh , Sue-Anne Ee Shioh; National University Health System, Regional Health System Planning Office<br>Yoong, Joanne<br>Vrijhoef, Hubertus ; University Hospital Maastricht, Department of Patient and Care; Vrije Universiteit Brussels |
| <b>Primary Subject Heading</b>: | Health services research                                                                                                                                                                                                                                                                                                                                                                                                                                                                                                                                                                                                                                                                                                                                                                                                                                                                                                                                                                                                                                                                                                                                          |
| Secondary Subject Heading:      | Public health                                                                                                                                                                                                                                                                                                                                                                                                                                                                                                                                                                                                                                                                                                                                                                                                                                                                                                                                                                                                                                                                                                                                                     |
| Keywords:                       | Realist Evaluation, Integrated Care, Mixed Methods Evaluation                                                                                                                                                                                                                                                                                                                                                                                                                                                                                                                                                                                                                                                                                                                                                                                                                                                                                                                                                                                                                                                                                                     |
|                                 |                                                                                                                                                                                                                                                                                                                                                                                                                                                                                                                                                                                                                                                                                                                                                                                                                                                                                                                                                                                                                                                                                                                                                                   |

SCHOLARONE™  
Manuscripts

## Realist evaluation of a complex integrated care program: protocol for a mixed methods study

Milawaty Nurjono<sup>1</sup>, Pami Shrestha<sup>2</sup>, Alice Lee<sup>2</sup>, Xin Ya Lim<sup>1</sup>, Farah Shiraz<sup>2,3</sup>, Shermin Tan<sup>2</sup>, Shing Hei Wong<sup>2</sup>, Kah Mun Foo<sup>2</sup>, Thomas Wee<sup>2</sup>, Sue-Anne Toh<sup>2</sup>, Joanne Yoong<sup>1,3,7</sup>, Hubertus Johannes Maria Vrijhoef<sup>4,5,6</sup>

<sup>1</sup> Centre for Health Services Research and Policy Research, Saw Swee Hock School of Public Health, National University Health System, Singapore

<sup>2</sup> Regional Health System Planning Office, National University Health System, Singapore

<sup>3</sup> Saw Swee Hock School of Public Health, National University of Singapore, Singapore

<sup>4</sup> Department of Patient and Care, University Hospital Maastricht, Maastricht, The Netherlands

<sup>5</sup> Vrije Universiteit Brussels, Brussels, Belgium

<sup>6</sup> Panaxea B.V., Amsterdam, the Netherlands

<sup>7</sup> Center for Economic and Social Research, University of Southern California, USA

Corresponding Author:

**Milawaty Nurjono**

Centre for Health Services and Policy Research

Saw Swee Hock School of Public Health, National University of Singapore

12 Science Drive 2 #10-01, Singapore 117549, Singapore,

E-mail: [ephmn@nus.edu.sg](mailto:ephmn@nus.edu.sg)

Phone: +(65)66013867, Fax: +(65)67791489

## Abstract

### Introduction

The lack of understanding of how complex integrated care programs achieve their outcomes due to the lack of acceptable methods leads to difficulties in the development, implementation, adaptation and scaling up of similar interventions. In this study, we evaluate an integrated care network, the National University Health System (NUHS) Regional Health System (RHS), consisting of acute hospitals, step down care, primary care providers, social services and community partners using a theory driven realist evaluation approach. This study aims to examine how and for whom the NUHS-RHS works to improve healthcare utilisations, outcomes, care experiences and reduce healthcare costs. By using a realist approach that balances the needs of context-specific evaluation with international comparability, this study carries the potential to address current research gaps.

### Methods and Analysis

This evaluation will be conducted in three research phases: 1. development of initial program theory (IPT) underlying the NUHS-RHS; 2. testing of program theory using empirical data; 3. refinement of IPT. IPT was elicited and developed through reviews of program documents, informal discussions and in-depth interviews with relevant stakeholders. Then, a convergent parallel mixed method study will be conducted to assess context (C), mechanisms (M) and outcomes (O) to test the IPT. Findings will then be analyzed according to the realist evaluation formula of CMO in which findings on the context, mechanisms will be used to explain the outcomes. Finally, based on findings gathered, IPT will be refined to highlight how to improve the NUHS-RHS by detailing what works (outcome), as well as how (mechanisms) and under what conditions (context).

### Ethics and dissemination

The National Healthcare Group, Singapore, Domain Specific Review Board (DSRB) reviewed and approved this study protocol. Study results will be published in international peer reviewed journals and presented at conferences and internally to NUHS-RHS and Ministry of Health, Singapore.

**Keywords:** Realist Evaluation, Integrated Care, Mixed Methods Evaluation

### Strengths and limitations of this study

- This study is one of the first study to holistically evaluate a new integrated care network in the context of South-East Asia.
- Using a theory-driven realist evaluation approach, findings from this study are expected to generate contextually relevant evidence for improving efficiency and effectiveness of integrated care as well as informing policy decisions in Singapore and similar health systems.
- The use mixed methods in this study allows us to draw on the strengths of both qualitative and quantitative methods, enhancing the credibility of the evaluation findings and allows for generation of in-depth insights.
- Inclusion of relevant stakeholders in the design of the evaluation provides confidence that the evaluation efforts are relevant and findings are likely to be adopted for improvement in current models and for development of future initiatives.
- Realist evaluation and mixed methods design are relatively new methods in comparison to the Randomized Controlled Trials (RCTs) commonly used in the evaluation of medical interventions. Therefore, this study design may draw criticism for not being as rigorous as the typical RCT.
- The use of mixed methods design increases complexity in data analysis. We plan to reach optimal integration of data at multiple levels by connecting and merging methods, findings and interpretation.
- We acknowledge selection bias associated with voluntary participation and selection of individuals who are able to provide informed consent this study. To account for this, demographic information including age, gender, ethnicity and role (for healthcare providers) are collected and will be compared between responders and non-responders

## Introduction

Across the world, rapidly aging populations and increasing demand for healthcare services call for a paradigm shift from disease-centered healthcare provision to a more holistic, people centered care<sup>1</sup>. People-centered care involves placing people and communities at the focus of health systems not diseases. It highlights the importance of empowering people to take charge of their health, takes into account holistic needs of a person and seeks to provide quality care timely and appropriately<sup>2</sup>. Integrated care supports people-centered care by coordinating healthcare services in a way that ensures people receive a continuum of care at the different levels and sites of care within the health system, according to their needs. The World Health Organization (WHO)'s framework of people centered integrated care describes the complexity of such interventions and the need to involve various stakeholders in their execution. Complex multi-component delivery strategies are also typically recommended<sup>1</sup>.

As characterized by Valentijn et al., care integration can take place on many dimensions: at the micro-level clinical level, the meso-level professional or organizational level and the macro or systemic level<sup>3</sup>. The types of interventions that qualify under the wide umbrella of "integrated care" vary tremendously, as do the settings in which they are introduced and their attendant benefits and costs. Moreover, introducing integrated care often calls for complex, multi-component programs that involve many stakeholders, sometimes with conflicting perspectives and interests. When implemented successfully, integrated people centered health services can be more effective, cost less, improve patient engagement and better prepared to respond to increasing demands for healthcare services<sup>4</sup>.

However, despite these growing needs and the availability of basic design principles related to integrated care, the development and implementation of such care models remains challenging. In their systematic review, Suter et al identified ten universal principles for successful health systems integration including (i) comprehensive services across the continuum of care, (ii) person-centeredness, (iii) collaboration between organisations (iv), standardized care delivery through interprofessional teams, (v) performance management, (vi) information systems, (vii) organizational culture, (viii) professional integration, (ix) good governance and (x) financial management<sup>5</sup>. Furthermore, it is acknowledged that successful implementation of integrated care requires an effective composition of interventions at the micro-, meso- and macro-levels<sup>6 7</sup>. However, the multifaceted interplay between the building blocks of integrated care and the influence of various contextual factors on outcomes render the development of a simple and standardized implementation model impossible<sup>8</sup>. In every instance, there is a need for healthcare providers and organizations to understand which care models work, for whom and how they work in the unique setting in which integrated care is planned for a particular population so as to facilitate implementation and ensure longer term sustainability<sup>9</sup>.

Current evaluations such as the "gold-standard" Randomized Controlled Trial (RCT) design rarely adequately or even explicitly address the context-specific drivers behind implementation outcomes and their relationship to the underlying program theory, making it difficult to interpret their findings in light of other programs in different settings. As a result, few evaluation strategies are widely-accepted as appropriate, and to date, the net benefit of integrated care interventions and understanding of how variable outcomes are achieved remains empirically uncertain. It is therefore essential to develop comprehensive, rigorous and practical methods to evaluate people-centered integrated care programs, not to just inform the selection of effective and efficient interventions but also to facilitate improvement and scaling-up. In the evaluation of such complex interventions, the Medical Research Council (MRC) argues for the importance of process evaluation in conjunction with outcome evaluation, to account for variability in implementation<sup>10</sup>. The MRC's process evaluation framework guides evaluators to understand the implementation processes (what is implemented and how), mechanisms of intervention (how the delivery of the intervention produces change) and contextual factors that affect implementation and outcomes<sup>11</sup>.

Singapore is typical of many other countries with a rapidly aging population that is accompanied by an increasing prevalence of chronic and complex illnesses<sup>12</sup>. Designed with an emphasis on providing episodic care within acute hospitals in a largely disease specific manner and controlling infectious disease in a young population, Singapore's health system now faces the challenge of ensuring appropriate care and long-term fiscal

1  
2 sustainability for a long-lived population at increasing risk of multiple chronic diseases<sup>13</sup>. In addition, having  
3 already reached the highest levels of efficiency in the world<sup>14</sup>, simple or easy fixes to increase performance while  
4 keeping costs low are increasingly rare. A radical change in vision and strategy is therefore needed, requiring  
5 complex systems-level interventions that bring about changes of organizational, policy, power and financing  
6 structures and break down existing siloes within the healthcare system to refocus on prevention, primary care,  
7 and community-based management. Such interventions will need to be built on a strong foundation of integrated  
8 care.  
9

10  
11 In 2012, the Ministry of Health (MOH) Singapore launched a major initiative to reorganize healthcare at the  
12 national level into six clusters or Regional Health Systems (RHS) to foster care integration<sup>15</sup>. This was recently  
13 reorganized in 2017, into three integrated clusters to better meet future healthcare needs<sup>16</sup>. Every RHS  
14 comprises of a network each led by a major public hospital working in close partnership with health care  
15 providers (primary care providers, community hospitals, nursing homes, home care and day rehabilitation  
16 providers) and social care providers (including Senior Activity Centers, Grassroots organizations and Social  
17 Service Offices) within the same geographical region. Each RHS has the mandate and funding support to  
18 design and implement integrated care programs that leverage this network to provide healthcare beyond the  
19 hospital to the community, value-driven healthcare and holistic care across the entire care continuum in a cost-  
20 effective way<sup>17</sup>. To support this common vision, every RHS was tasked to implement programs identified by the  
21 MOH to be of priority and held accountable for same outcomes jointly agreed on between the MOH and the  
22 RHSes throughout the country. Following this lead, each RHS implemented the priority programs tailored to the  
23 unique needs and demographic of the population in which it serves as well as the different strengths of  
24 community partners within its network. Other programs unique to respective RHS were also developed and  
25 implemented accordingly.  
26  
27

28  
29 In this study, we propose to take advantage of a unique opportunity to document and evaluate the formation and  
30 implementation of a multi-pillared regional integrated care network. This evaluation study began in June 2016 at  
31 the National University Hospital System (NUHS)- RHS, the RHS at the western part of Singapore. This study  
32 aims to examine how and for whom the NUHS-RHS, as an integrated care network, works from healthcare  
33 providers' and healthcare users' perspectives to improve healthcare utilization, health outcomes and care  
34 experiences as well as to reduce healthcare costs.  
35  
36

### 37 **Methods and Analysis**

38 Considering the developmental nature of the NUHS-RHS, this evaluation is designed primarily as a formative  
39 evaluation which incorporates outcome valuation principles<sup>18</sup>. The evaluation findings will be used to facilitate  
40 modifications to existing NUHS-RHS programs as well as to provide evidence to support the increased likelihood  
41 of future success.  
42  
43

44  
45 The evaluation will be conducted using a realist evaluation approach<sup>19</sup>, which seeks to test and refine the  
46 program theory while assessing whether and how the program succeeds in the local setting, in order to generate  
47 important insights not just for Singapore but for the wider field of integrated care research. Realist evaluation is  
48 increasingly applied in the evaluation of complex healthcare interventions as it seeks to provide a more explicit  
49 and in-depth understanding of what works, for whom and in what circumstances and has been recommended for  
50 the evaluation of integrated care interventions<sup>20 21</sup>. It is a theory-driven approach in which interventions are  
51 assumed to be based on theories but are also active, flexible to changes and embedded in a social reality that  
52 influences how the intervention is implemented and how various actors in that reality respond to it<sup>19</sup>. A realist  
53 program theory specifies not only which outcomes are linked to the intervention, but also what mechanisms  
54 generate the outcomes and what features of the context affect them. The context-mechanism-outcome (CMO)  
55 configuration is used as the main structure for analysis, with the goal of identifying both mechanisms (what and  
56 how components of interventions result in changes) and contextual factors (features of the conditions which  
57 influence the mechanisms of interventions) are associated with variation in outcomes<sup>22 23</sup>. Pawson and Tilley  
58  
59

60 [Manuscript] Realist Evaluation of a Complex Integrated Care Program: a Study Protocol



1  
2 argue that an intervention can only achieve successful outcomes if the appropriate ideas are applied to the right  
3 context with appropriate social and cultural conditions<sup>22</sup>. A realist evaluation therefore includes a theory-driven  
4 formative evaluation<sup>24</sup>, process evaluation<sup>25</sup> as well as outcomes evaluation, and avoids the rigorously  
5 successionist format of experimental design.  
6

7 This evaluation will be conducted in three research phases according to the framework for realist evaluation  
8 outlined by Pawson and Tilley (Figure 1)<sup>22</sup>: 1. Development of initial program theory underlying the NUHS-RHS;  
9 2. Testing of program theory using empirical data; 3. Refinement of initial program theory.  
10

### 11 **Phase 1: Development of Initial Program Theory (IPT)**

12 This evaluation began with first eliciting the IPT which subsequently formed the basis of the evaluation, focus the  
13 evaluation activities and determined the appropriate study design, data collection and analysis methods. First,  
14 program-related documents of the NUHS-RHS which describe the rationales, components of interventions and  
15 program protocols were reviewed to identify the underlying assumptions about how the respective programs are  
16 expected to work to achieve their intended outcomes. Ethnographic observations were then conducted to verify  
17 and obtain additional information to comprehensively describe the theory of change underlying the NUHS-RHS  
18 programs.  
19

20 Subsequently, key stakeholders involved in the planning, development and implementation of the NUHS-RHS  
21 programs were engaged through group discussions to identify: (i) factors which influence the implementation of  
22 the programs, (ii) initial observations on how and for whom the programs work, (iii) objectives of evaluation and  
23 (iv) outcomes which are relevant to the stakeholders. In collaboration with the RHS strategic planning office, a  
24 logic model (Figure 2), a tool that describes logical linkages among program resources, activities, and intended  
25 outputs, audiences, and short-, intermediate-, and long-term outcomes<sup>26</sup> related to the establishment of NUHS-  
26 RHS was drafted to depict IPT underlying the NUHS-RHS. To ensure the accuracy of the IPT, the logic model  
27 was circulated to stakeholders who were previously engaged for further inputs. After which, refinement to the IPT  
28 was made.  
29

30 As illustrated under activities on Figure 2, programs (P1-6) describes the MOH priority programs implemented  
31 nationally. The NUHS-RHS Integrated Interventions and Care Extension (P1) program aims to help patients with  
32 complex conditions who were admitted at least three or more times a year through a holistic case management.  
33 NUHS Transition Care Program (P2) was implemented to enable patients to transit smoothly from hospital to  
34 homes through a multidisciplinary team to ensure continuity of care. Appropriate Sitting of Care (P3 and P4)  
35 aims to ensure appropriate sitting of patients who are medically stable and deemed to not required specialist  
36 care from acute hospital to the community through partnership with primary and community care providers.  
37 Health Promotion and Disease Management (P5) focuses on health education, early detection of chronic  
38 diseases and timely interventions to prevent development of chronic illnesses as well as slow down the  
39 deterioration of diseases. Strengthening of primary and community care within the NUHS-RHS (P6) is achieved  
40 through cross deployment of skilled manpower from the acute hospital to the partnering primary and community  
41 care providers so as to improve the capability and confidence of the partners of the NUHS-RHS. Leveraging on  
42 tele-health and IT enablers, the Carehub aims to provide a single point of contact through individual's continuum  
43 of care post hospital discharge. The Primary Care Network (PCN) brings together a group of family physicians  
44 and community partners to create a support network for patients with chronic medical conditions in the  
45 community<sup>27</sup>.  
46

### 47 **Phase 2: Testing of Program Theory using Empirical Data**

#### 48 ***Prioritization of NUHS-RHS Programs for Testing of Program Theory***

49 As the number of programs undertaken under the purview of the NUHS-RHS is large, programs were selected  
50 for the testing of the IPT in consultation with stakeholders including healthcare providers and administrators,  
51 based on: (i) maturity of program, (ii) urgency for evaluation, (iii) complexity of programs and (iv) scientific  
52 importance.  
53

54 [Manuscript] Realist Evaluation of a Complex Integrated Care Program: a Study Protocol  
55  
56  
57  
58  
59  
60

1  
2  
3 Program maturity was assessed based on the duration of program implementation. A program that had been  
4 implemented for a longer duration was considered to more mature and given higher priority than one which was  
5 recently implemented. Programs nearing the end of their funding period were also given higher priority for  
6 evaluation, as evaluation was essential to inform the future development of the program. Complexity was  
7 determined by assessing the number of dimensions of integrated care as defined previously (clinical,  
8 professional, organizational, systematic, normative and functional integration)<sup>3</sup>. A program that set out to  
9 integrate care in more dimensions was considered to be more complex than one which integrated care in fewer  
10 dimensions.  
11

12  
13 Finally, scientific importance was examined by a knowledge gap analysis conducted by reviewing available  
14 published articles relevant to these programs on PubMed. A program with the least number of relevant articles  
15 was considered to be of greatest scientific importance. According to these criteria, MN and HJMV ranked various  
16 NUHS-RHS programs as low, medium and high priority for evaluation. Through the priority-setting process, four  
17 programs (P1, P2, P3 and P4) were identified to be the best candidate programs for evaluation.  
18  
19

### 20 **Study Participants**

21 Two distinct groups of study participants – healthcare providers/managers and healthcare users – are selected  
22 based on defined criteria in this study. Healthcare providers/managers who are a part of the governance,  
23 planning and implementation of the programs are invited to take part in structured interviews and to complete the  
24 online Rainbow Model of Integrated Care (RMIC) survey<sup>28</sup>, while healthcare users, including patients or proxies  
25 (caregivers), are invited for structured interviews or prospective surveys over three time points. Interactions  
26 between healthcare providers and healthcare users will be observed  
27  
28

### 29 **Study Design**

30 Given the complexity of integrated care programs being evaluated and a range of perspectives in which this  
31 study tries to capture, a convergent parallel mixed methods study will be undertaken to test the IPT developed in  
32 phase 1. Using the convergent parallel strategy, both quantitative and qualitative data will be collected  
33 concurrently. Components will be given equal weight and two datasets will be analyzed, compared and merged  
34 through iterative cycles of validation and confirmation of findings<sup>29</sup>.  
35  
36

### 37 **Evaluation of implementation, context and mechanisms**

38 Implementation fidelity, context and mechanisms that underpin the NUHS-RHS as a whole will be  
39 assessed according to the modified version of the Conceptual Framework of Implementation Fidelity (CFIF)<sup>30</sup>.  
40 The CFIF provides a framework to assess content, frequency and dose of program implementation and the  
41 moderating factors affecting implementation fidelity of complex interventions. Moderating factors including  
42 participants' responsiveness, intervention complexity, comprehensiveness of policy description, strategies to  
43 facilitate implementation, quality of delivery, recruitment and context will be assessed. Data will be gathered  
44 through reviews of program documents, medical records, structured interviews healthcare providers and  
45 observations of actual delivery of interventions as described in Table 1.  
46  
47

48 Program documents including guidelines and databases will be reviewed by evaluators. Program guidelines will  
49 be examined to provide an understanding of the planned activities for each program and the proposed  
50 mechanisms of achieving targeted outcomes. The number of eligible patients referred, response rate, reasons  
51 for non-enrolment into the programs, frequency of program delivery as well as duration of enrolment will be  
52 retrieved from the existing program databases to determine the coverage, frequency and duration of respective  
53 programs. Furthermore, medical records of patients enrolled into the programs will be reviewed to provide a  
54 comprehensive picture of interactions between healthcare providers' and users throughout a patient's healthcare  
55 journey from enrolment to discharge. Medical records will be proportionately sampled based on the number of  
56 healthcare providers that are able to provide referrals within each program and the time point at which patients  
57 are enrolled into the programs.  
58  
59

60 [Manuscript] Realist Evaluation of a Complex Integrated Care Program: a Study Protocol

Healthcare providers (physicians, nurses, and other allied health professionals), and healthcare managers (care coordinators and healthcare administrators) who are involved in the planning, development and implementation of the four programs are invited to participate in face-to-face structured interviews. Written informed consent and demographic information including their age, gender, duration of involvement and roles will be collected prior to the interviews. Guided by the CFIF, content of interventions and moderating factors, which may have contributed or hampered the implementation of the interventions, will be assessed during interviews. All interviews will be audio-recorded, transcribed verbatim and coded thematically.

Two sessions of ethnographic observations (induction and follow up) for each study participant will be randomly conducted at patients' homes and/or through phone calls depending on where and how the interventions are provided. We expect to observe two sessions each for approximately 30 participants from each program and informed consent will be obtained from participants. Content of care delivery, interactions between healthcare professionals and users together patients' responses to the service will be observed. For each session, field notes will be taken, findings will be written in narratives and analyzed thematically.

#### *Data Analysis*

Data from the various sources will be given equal weightage and will subsequently be integrated at data analysis stage guided by the modified version of the CFIF using the triangulation protocol methodology<sup>31</sup>. The extent of which the intervention components were implemented will be rated on a 5-points Likert scale ranging from never to always by two independent evaluators. Potential moderating factors which affect the implementation of the programs will be assessed by examining participant responsiveness, comprehensiveness of protocols/guidelines, support available to facilitate recruitment and implementation, quality of service delivery and context (patient, professionals, organizational, political and economic factors). Analysis will also take into account other emergent themes not defined by the CFIF.

Table 1: Evaluation of implementation fidelity, context and mechanism underlying NUHS-RHS programs

|                    | <b>Specific component</b>               | <b>Data sources</b>                                                                                                                  |
|--------------------|-----------------------------------------|--------------------------------------------------------------------------------------------------------------------------------------|
| Adherence          | Content                                 | Ethnographic observation, medical records review and interview with program team members                                             |
|                    | Frequency / duration                    | Medical records review, interview with program team members and healthcare users                                                     |
|                    | Coverage                                | Program databases, interview with program team members                                                                               |
| Moderating factors | Participant responsiveness              | Ethnographic observation, interview with program team members and healthcare users and possibly medical records review (if recorded) |
|                    | Intervention complexity                 | Program documents (protocols, guidelines)                                                                                            |
|                    | Comprehensiveness of policy description | Program documents (protocols, guidelines)                                                                                            |
|                    | Strategies to facilitate implementation | Interview with program team members                                                                                                  |
|                    | Quality of delivery                     | Interview with healthcare users                                                                                                      |
|                    | Recruitment                             | Program database, interview with program team members                                                                                |
|                    | Context                                 | Interview with program team members                                                                                                  |

## ***Evaluation of outcomes***

### ***Healthcare utilization and health outcomes***

Healthcare utilization, health outcomes and patient-reported experiences and outcomes associated with the NUHS-RHS programs will be assessed through review of clinical indicators, structured interviews and administration of surveys as described below, to identify alignment with the Chronic Care Model (CCM)<sup>32</sup>. The CCM identifies the community, the health system, self-management support, delivery system design, decision support and clinical information systems as key elements of a health system that are essential to provide good quality chronic care<sup>32</sup>.

The effect of the program on healthcare utilization will be measured by analyzing the number of admissions, Emergency Department (ED) attendance, number of specialist outpatient clinic (SOC) attendances, average bed days, for patients enrolled from the start of the programs. To capture the potentially evolving nature of the programs and their effects, data will be collected over various time points with respect to their respective date of enrollment program— 12 months before (T-12), 9 months before (T-9), 6 months before (T-6), 3 months before (T-3), date of enrolment (T0), 3 months after (T3), 6 months after (T6), 9 months after (T9), 12 months after (T12) and 15 months after (T15). Demographic data (gender, age, race, comorbidity and socio-economic status) will also be retrieved for all patients.

Clinical indicators at various time points for all patients who are enrolled and decline will be extracted from the existing NUHS-RHS databases. In reference to the point of patients' enrolment into the programs, clinical indicators at T-12, T-9, T-6, T-3, T0, T3, T6, T9, T12 and T15 will be extracted. In addition, the 8-item Morisky Medication Adherence Scale (MMAS-8) will be used to assess patients' compliance to prescribed medications<sup>33</sup>. The MMAS-8 is a structured self-report measure of medication-taking behaviour that has been widely used in various cultures and is considered a gold standard of measurement<sup>34</sup>.

The effect of the programs on patient-reported outcomes; patients' quality of life, care experience and self-efficacy will be assessed using validated survey instruments over three time points, at the starting point, mid-way and the end of the program. Quality of life of patients will be assessed using the EuroQoL- 5 Dimension (EQ-5D) instrument. The EQ-5D consists of 5 items, which recognizes the fundamental importance of independent physical, emotional and social functioning, as part of a more holistic view of health. It has been validated in Singapore and is a common measure used to assess quality of life as the result of healthcare interventions<sup>35</sup>. Patients' perception of the quality of care received will be examined using the Patient Assessment of Care for Chronic Conditions (PACIC)<sup>36</sup>. The PACIC seeks to understand the frequency with which various aspects of care patients with chronic conditions received from their healthcare providers aligned with components of the Chronic Care Model (CCM). The healthcare providers include regular doctors, nurse, care coordinators, allied health providers and others. PACIC has been widely validated and used at various healthcare settings across the world<sup>37-40</sup>.

Patients' experience of care continuity will be assessed using the CCAENA (Continuity of care between care levels) questionnaire. The CCAENA consists of 29 items and assesses continuity of care across different levels from the patients' perspectives<sup>41</sup>. The components covered by the CCAENA include the relationships between patient and primary care providers, and between specialists and primary care providers. Finally, self-efficacy is

1  
2 measured using the Patient Activation Measure (PAM), which consists of 13 items will be used to measure  
3 patient knowledge, skill, and confidence for self-management<sup>42</sup>.  
4

5 Complementary to the quantitative analysis of outcomes, a more in-depth understanding of healthcare users'  
6 perception of healthcare quality, including why and how it has worked, or did not work, will be explored  
7 qualitatively through interviews with healthcare users. Healthcare users including patients and their family  
8 members who have had experiences with the programs for at least 3 months are invited to take part in face to  
9 face interviews. Interviews are structured according to the program logic model, and key components of the  
10 Chronic Care Model (CCM)<sup>32</sup>. Perception of the level of care integration as well as recommendations for  
11 improvement to the programs will also be elicited during the interviews. Potential participants will be recruited  
12 through care coordinators and will be screened against the selection criteria by the study team prior to the  
13 interviews. Only those who are eligible and are willing to be audio recorded will be interviewed. Written informed  
14 consent and demographic information will be attained from the participants before proceeding with the  
15 interviews. Interviews will be conducted in English, Chinese or Malay at the patients' homes or at NUHS. Notes  
16 will be taken during observations and all interviews are audio recorded, transcribed verbatim and will be  
17 imported to Atlas.ti 7.0 for analysis.  
18  
19

### 20 21 *Data-analysis*

22 An interrupted time series analysis (ITSA) will be conducted for all programs to examine the effects of the  
23 NUHS-RHS programs on healthcare utilization, health outcomes and care experiences. In addition, difference in  
24 difference (DID) analysis will be conducted for those with comparison groups<sup>43 44</sup>. Proposed to be more flexible  
25 compared to the traditional randomized controlled trials analysis, ITSA is conducted to estimate the changes  
26 associated with the introduction of interventions over time. To estimate changes in the above outcomes, time  
27 series regression that includes data from patients enrolled into the programs 1 year prior to and after referral to  
28 the programs will also be run. The model will have 3 main parameters: 1. Estimation of the annual trend in  
29 healthcare utilisation (i.e. hospital admission, SOC attendances, ED attendances and average bed days) and  
30 clinical indicators one year before until the introduction of the programs 2. Estimation of changes in all outcomes  
31 associated with introduction of the programs; 3. The trend change in outcomes associated with each year. For  
32 each outcome, we will apply a generalized estimating equation model clustering by the combination of age, sex,  
33 and comorbidity score with robust standard errors and an autoregressive correlation matrix. We will report rate  
34 ratios (RRs) calculated from the parameter estimations, which represent population-averaged rates. DID  
35 analysis will subsequently be performed to estimate the impact of the programs by comparing differential effects  
36 in the outcomes between intervention and comparison groups. Sensitivity analyses will be performed and  
37 confounding effects will be accounted for.  
38  
39  
40

41 Observation notes and interview transcripts will be thematically coded by two independent researchers using a  
42 two-steps according to the integrated approach as described by Bradley et al<sup>45</sup>. We have selected this  
43 approach as this study adopts an existing CCM framework, but we would like to ensure completeness of findings  
44 by assuring other emergent themes not previously described in the CCM are also considered. The first step  
45 consists of a deductive analysis, where units of data are coded according to the CCM. This will be followed by an  
46 inductive analysis, where new themes or unexpected findings are elicited through coding and categorizing. If the  
47 interviews were conducted in other languages beside English, these will be transcribed and the analysis will be  
48 conducted by a researcher that is fluent in that language. The relevant quotes representative of the analysis will  
49 then be translated into English. Subsequently, data collected through prospective surveys and interviews with  
50 healthcare users will be merged using the CCM as a framework.  
51  
52

### 53 *Care Integration*

54 The extent of care integration with the NUHS-RHS will be assessed through the administration of the RMIC  
55 measurement tool (MT) adapted to Singapore<sup>28 46</sup>. Tested and validated in Singapore, the RMIC-MT was  
56 developed to measure the extent of care integration from the healthcare providers' perspectives. It consists of 62  
57 items grouped into eight factors of integrated care related to person-focused and population-based care, clinical  
58  
59

1  
2 integration, professional, organizational, systematic, functional and normative integration. The RMIC-MT uses a  
3 four point Likert scale ranging from “never” to “all the time” and an additional option of “not sure/don’t know”<sup>28</sup>.

#### 4 5 *Data-analysis*

6 Incomplete RMIC-MT will be excluded from analysis. The “not sure/don’t know” option will be considered as  
7 missing data and will be imputed with median score of each item. The RMIC-MT will be scored as described  
8 previously by Nurjono et al. in which the average score for respective dimensions of RMIC and overall care  
9 integration will be computed. A higher score on the RMIC-MT is considered to reflect a greater extent of care  
10 integration. The RMC was developed through a systematic literature review and validated by international Delphi  
11 panels.<sup>3</sup> It describes six dimensions of care integration (clinical, professional, organizational, functional and  
12 normative integration) across different levels within a health system needed to provide a continuous,  
13 comprehensive and coordinated delivery of services to the individual and population. Furthermore, the degree of  
14 integrated care within NUHS will be compared to the degree of integrated care in other health systems  
15 (Netherlands and Australia) in which the RMIC-MT has been administered.  
16  
17

#### 18 19 **Healthcare cost**

20 To examine the effect of NUHS-RHS programs on healthcare costs, six categories of costs including (i)  
21 development costs (ii) program implementation costs (iii) healthcare utilisation costs (inpatient, outpatient and  
22 community) (iv) productivity costs incurred to patients and/or caregivers (v) travel costs borne by patients for  
23 travelling to receive care and (vi) caregiving cost will be collected<sup>47</sup>. Cost categories (i), (ii), (iii) are considered  
24 related to the healthcare system whereas categories (iv)-(vi) take into account costs from the societal  
25 perspective.  
26

27  
28 Development costs include costs incurred during the development of the NUHS-RHS and their respective  
29 programs. The program implementation costs take into account costs related to the implementation of the  
30 programs including the manpower costs, travel costs, costs of equipment, and costs of materials used for patient  
31 and caregiver training and costs associated with multidisciplinary team meetings. The development and  
32 implementation costs will be systematically collected using WHO’s CostIt instrument<sup>48</sup> and will be divided by the  
33 number of clients included into the programs to obtain per patient cost.  
34

35 The cost of healthcare utilisations (hospital inpatient, outpatient services, primary and community care services),  
36 productivity costs (estimated based on absence from paid employment due to illness or providing care), travel  
37 costs (distance to healthcare providers and expenses incurred related to providing care to enrolled patients) and  
38 caregiving costs (cost related to the hire of domestic helpers, costs related to improvement in home environment  
39 and costs of caregiver training) will be collected using routinely collected hospitals data and a cost questionnaire  
40 administered to participants at T0 and T12 where each participant will be asked to recall his/her expenses 3  
41 months prior to the time of the interview.  
42  
43

#### 44 45 *Data-analysis*

46 Differences in costs by category before and after enrollment will be analyzed using paired Wilcoxon tests. The  
47 difference will be considered statistically significant if the p-value < 0.05. Paired analysis will be adjusted by age,  
48 gender and number of co-morbidities at baseline. To estimate the cost-effectiveness of the right-site care  
49 programs, an incremental cost-effectiveness ratio (ICER) will be computed using changes in Quality-adjusted life  
50 years (QALYs) attributable to the program as the primary measure of program effectiveness, divided by changes  
51 in costs costs measured both from the health system and societal perspectives. The program will be considered  
52 cost effective if the ICER is lower than Singapore-specific thresholds. Currently, in the absence of a formal  
53 nationally-accepted threshold for societal costs, we will adapt a default threshold consistent with WHO CHOICE  
54 benchmarks of approximately \$60-75000 per QALY<sup>49</sup> The appropriate cost-effectiveness thresholds will be  
55 reviewed and updated to be consistent with national best practice at the time of completion of the analysis.  
56  
57

#### 58 59 **Phase 3: Refinement of Initial Program Theory**

60 [Manuscript] Realist Evaluation of a Complex Integrated Care Program: a Study Protocol

1  
2 Finally, to provide an overall evaluation of the NUHS-RHS taking into consideration various perspectives,  
3 qualitative and quantitative data obtained from various stakeholders including the program team members and  
4 patients/proxies will be integrated through the process of triangulation at the data interpretation stage when both  
5 quantitative and qualitative data have been analysed separately<sup>31</sup>. The triangulation protocol will be adopted to  
6 guide data integration by first producing a convergence coding matrix according to the guiding conceptual  
7 frameworks to display findings emerging from each component followed by consideration of where there is  
8 agreement, partial agreement, silence or dissonance between findings from different data sources. Assessment  
9 of the fit of data integration will be conducted by examining the coherence of findings from various methods  
10 used, as suggested by Fetters et al<sup>50</sup>. Data on context, mechanisms and outcomes will be gathered and  
11 analyzed guided by respective frameworks as described in phase 2. These will then be linked according to the  
12 realist evaluation CMO formula in which findings on context and mechanisms will be used to explain outcomes  
13 observed. A few potential CMO configurations will then be proposed and discussed (for validation purposes)  
14 through 2-3 focus group discussions comprising of 8-10 different stakeholders each. After which, the initial  
15 program theory will be refined to highlight how to improve the NUHS-RHS by detailing what works (outcome),  
16 as well as how (mechanisms) and under what conditions (context).  
17  
18  
19  
20

### 21 **Ethics and dissemination**

22 Data collection for this study was started in June 2016 and is expected to continue until June 2019. The National  
23 Healthcare Group, Singapore, Domain Specific Review Board reviewed and approved this study protocol Board  
24 (DSRB Ref: 2016/00410 and 2016/00914). Written informed consent forms are obtained from participants  
25 (healthcare providers and users) included for interviews and surveys. To maintain confidentiality of the research  
26 participants, identifiable information obtained from research participants are kept securely under password  
27 protection. A unique respondent identification is assigned to each study participant so that data can be  
28 processed anonymously. Waiver of informed consent was obtained for analysis of retrospective data collected  
29 as part of the hospital and Ministry of Health (MOH) routine data collection and no identifiable data are known by  
30 the researchers. Study results will be written up and published in international peer reviewed journals and will be  
31 presented at national, international conferences and internally at NUHS-RHS and the MOH, Singapore  
32  
33  
34

### 35 **Mitigation of Potential Risks and Limitations**

36 While realist evaluation approach and mixed methods design have been advocated for the evaluation of  
37 complex healthcare interventions, they are relatively new in comparison to the RCTs commonly used in the  
38 evaluation of medical interventions. Due to the lack of familiarity on the use of realist evaluation and mixed  
39 methods in the field of health and healthcare research, this study design may draw criticism for not being as  
40 rigorous as the typical RCT. Furthermore, we acknowledge that the use of mixed methods design also increases  
41 complexity. Nonetheless, we strive to reach optimal integration of data at multiple levels – study design,  
42 methods, interpretation and reporting – using the convergent parallel mixed methods approach which connects  
43 and merges methods and findings.  
44  
45

46 Furthermore, as participation in the evaluation efforts is voluntary and only individuals who are able or have  
47 proxies who are able to provide informed consent are included in this evaluation effort, we also recognize that  
48 selection bias may be introduced in this study. To account for selection bias, demographic information including  
49 age, gender, ethnicity and role (for healthcare providers) are collected and will be compared between  
50 responders and non-responders. Given the prospective nature of some of our data collection methods,  
51 difficulties in following up with respondents are also anticipated. To minimize the numbers lost to follow up,  
52 research appointments are scheduled at participants' time and place of convenience in collaboration with  
53 participants' care coordinators. In the event when loss to follow is inevitable due to death, survival analysis will  
54 be conducted to account for the missing data.  
55  
56

57 In addition, it must be acknowledged that as much as it was intended for the delivery of care to be consistent,  
58 variability in the extent of how care was provided exists, especially across different disease specific subprograms

59 [Manuscript] Realist Evaluation of a Complex Integrated Care Program: a Study Protocol  
60

1  
2 and also within individual sub-program. To account for such variability, subgroup analysis will be conducted and  
3 adjustments based on the number of care providers within a subprogram will also be made.  
4

## 5 **Discussion**

6 Singapore is in the early phase of developing new integrated care models. Notwithstanding the scope of more  
7 general design principles of integrated care, development and implementation of integrated care requires  
8 adaptation to the context, needs of the local population and the capacity and capability of local healthcare  
9 providers. To the best of our knowledge, this study provides the first opportunity to holistically evaluate the  
10 NUHS-RHS, and one of the first to conduct a comprehensive evaluation of a new integrated care network in the  
11 context of South-East Asia using a realist evaluation approach.  
12  
13

14 This study carries significant implications for the health system and society in Singapore as well as for the field of  
15 integrated care internationally. By ensuring the rigor of this evaluation and adopting a realist approach, findings  
16 from this study are expected to generate contextually relevant evidence for improving efficiency and  
17 effectiveness of the NUHS-RHS as it develops and also to inform future initiatives of the NUHS. It is also  
18 expected to yield policy-relevant insights for national-level decision makers as they continue to monitor and  
19 refine the RHS model for Singapore over the coming years. In designing this evaluation, stakeholders including  
20 program team members, healthcare managers and policymakers were engaged to help evaluators understand  
21 the context in which the programs were implemented, how interventions have been delivered, to define  
22 objectives, evaluation questions and outcomes which are relevant to the stakeholders and to identify constraints  
23 to the feasibility of implementation of the evaluation itself. Various potential pitfalls in evaluation design and  
24 implementation have been collectively identified and risk management strategies put into place wherever  
25 possible. This provides confidence that the evaluation efforts are rigorous, relevant and has the potential to  
26 provide insights for program improvement as well as provide evidence to support policy decisions to scale-  
27 up/down activities within NUHS. Engagement of stakeholders early in the evaluation efforts is also expected to  
28 increase the likelihood that recommendations will be adopted to improve the relevant components of the existing  
29 care models and define future new care models. On the other hand, the involvement of stakeholders may exert  
30 pressure to act on preliminary findings. Understanding these dynamics will also be of interest as part of the  
31 evaluation itself.  
32  
33  
34  
35

36 Like NUHS, other integrated care networks within Singapore and abroad are experimenting with new integrated  
37 care models. However, the findings from existing research of the (cost-)effectiveness of integrated care are to a  
38 major extent inconsistent because of the variations in the strategic outcomes, methods of implementation,  
39 contexts (i.e. system and policy) and/or applied evaluation measures. Examples include next generation  
40 accountable care organisations in the United States <sup>51</sup>, integrated care pioneers and vanguard sites in England  
41 <sup>52 53</sup>, population health management pilots in the Netherlands <sup>54</sup>, integrated care pilots in Belgium <sup>55</sup> and  
42 the integrated care demonstrators in Australia <sup>56</sup>. This study provides an opportunity to fill some of the gaps in  
43 current research by evaluating the NUHS-RHS and its constituent programs using a rigorous and  
44 comprehensive design that balances the needs of context-specific evaluation with international comparability.  
45 Wherever possible, steps such as using internationally validated instruments for evaluation of chronic disease  
46 are taken, to allow for meaningful international comparisons that can increase collective knowledge about the  
47 restructuring of chronic care models towards advancing integrated care.  
48  
49  
50  
51  
52  
53  
54  
55  
56  
57  
58  
59  
60



**References:**

1. World Health Organization. WHO global strategy on people-centred and integrated health services- interim report 2015.
2. Starfield B. Is Patient-Centered Care the Same As Person-Focused Care? *The Permanente Journal* 2011;15(2):63-69.
3. Valentijn PP, Schepman SM, Opheij W, et al. Understanding integrated care: a comprehensive conceptual framework based on the integrative functions of primary care. *International Journal of Integrated Care* 2013;13:e010.
4. World Health Organization. Integrated Health Services - What and Why? . Geneva, 2008.
5. Suter E, Oelke ND, Adair CE, et al. Ten Key Principles for Successful Health Systems Integration. *Healthcare quarterly (Toronto, Ont)* 2009;13(Spec No):16-23.
6. Minkman MMN. Developing integrated care. Towards a development model for integrated care. *International Journal of Integrated Care* 2012;12:e197.
7. van der Klauw D, Molema H, Grooten L, et al. Identification of mechanisms enabling integrated care for patients with chronic diseases: a literature review. *International Journal of Integrated Care* 2014;14(3) doi: <http://doi.org/10.5334/ijic.1127>
8. Goodwin N. Understanding and Evaluating the Implementation of Integrated Care: A 'Three Pipe' Problem. *International Journal of Integrated Care* 2016;16(4):19. doi: 10.5334/ijic.2609
9. Greenhalgh T, Robert G, Macfarlane F, et al. Diffusion of Innovations in Service Organizations: Systematic Review and Recommendations. *The Milbank Quarterly* 2004;82(4):581-629. doi: 10.1111/j.0887-378X.2004.00325.x
10. Craig P, Dieppe P, Macintyre S, et al. Developing and evaluating complex interventions: the new Medical Research Council guidance. *BMJ* 2008;337 doi: 10.1136/bmj.a1655
11. Moore GF, Audrey S, Barker M, et al. Process evaluation of complex interventions: Medical Research Council guidance. *BMJ : British Medical Journal* 2015;350 doi: 10.1136/bmj.h1258
12. Ministry of Health Singapore. STATE OF HEALTH Report of the Director of Medical Services 2003-2012. Singapore
13. Evans J, Baker G, Berta W, et al. The evolution of integrated health care strategies. *Advances in Health Care Management* 2013;15:125-61.
14. Bloomberg. Bloomberg Best (And Worst): Most Efficient Healthcare 2014: Countries 2017 [Available from: <https://www.bloomberg.com/graphics/best-and-worst/#most-efficient-health-care-2014-countries2017>.
15. Ministry of Health. Healthcare 2020: Improving Accessibility, Quality & Affordability 2012.
16. Ministry of Health S. Reorganisation of healthcare system into three integrated clusters to better meet future healthcare needs 2017 [Available from: [https://www.moh.gov.sg/content/moh\\_web/home/pressRoom/pressRoomItemRelease/2017/reorganisation-of-healthcare-system-into-three-integrated-cluste.html](https://www.moh.gov.sg/content/moh_web/home/pressRoom/pressRoomItemRelease/2017/reorganisation-of-healthcare-system-into-three-integrated-cluste.html) accessed 01 March 2017.

- 1  
2  
3  
4  
5  
6  
7  
8  
9  
10  
11  
12  
13  
14  
15  
16  
17  
18  
19  
20  
21  
22  
23  
24  
25  
26  
27  
28  
29  
30  
31  
32  
33  
34  
35  
36  
37  
38  
39  
40  
41  
42  
43  
44  
45  
46  
47  
48  
49  
50  
51  
52  
53  
54  
55  
56  
57  
58  
59
17. Ministry of Health Singapore. Speech by Minister for Health, Mr Gan Kim Yong, at the MOH Committee of Supply Debate 2016 [Available from: [https://www.moh.gov.sg/content/moh\\_web/home/pressRoom/speeches\\_d/2016/speech-by-minister-fo-health--mr-gan-kim-yong--at-the-moh-commit.html2017](https://www.moh.gov.sg/content/moh_web/home/pressRoom/speeches_d/2016/speech-by-minister-fo-health--mr-gan-kim-yong--at-the-moh-commit.html2017)].
  18. CDC. Types of Evaluation 2017 [Available from: <https://www.cdc.gov/std/Program/pupestd/Types%20of%20Evaluation.pdf2017>].
  19. Pawson R, Tilley N. Realistic Evaluation. London SAGE 1997.
  20. Salter KL, Kothari A. Using realist evaluation to open the black box of knowledge translation: a state-of-the-art review. *Implementation Science : IS* 2014;9:115. doi: 10.1186/s13012-014-0115-y
  21. Byng R, Norman I, Redfern S. Using Realistic Evaluation to Evaluate a Practice-level Intervention to Improve Primary Healthcare for Patients with Long-term Mental Illness. *Evaluation* 2005;11(1):69-93. doi: 10.1177/1356389005053198
  22. Pawson R, Tilley N. Realist Evaluation 2004
  23. Berwick DM. The science of improvement. *JAMA* 2008;299(10):1182-84. doi: 10.1001/jama.299.10.1182
  24. Parry GJ, Carson-Stevens A, Luff DF, et al. Recommendations for Evaluation of Health Care Improvement Initiatives. *Academic Pediatrics* 2013;13(6, Supplement):S23-S30. doi: <http://dx.doi.org/10.1016/j.acap.2013.04.007>
  25. Craig P, Dieppe P, Macintyre S, et al. Developing and evaluating complex interventions: the new Medical Research Council guidance. *The BMJ* 2008;337:a1655. doi: 10.1136/bmj.a1655
  26. McCawley P. The Logic Model for Program Planning and Evaluation University of Idaho Extension; [Available from: <https://www.cdc.gov/std/Program/pupestd/Components%20of%20a%20Logic%20Model.pdf>].
  27. System NUH. Regional Health System - Our Programmes [Available from: <http://www.nuhs.edu.sg/regional-health-system/programmes.html2016>].
  28. Nurjono M, Valentijn PP, Bautista MAC, et al. Psychometric Validation of Rainbow Model of Integrated Care Measurement Tool (RMIC-MT) within Singapore's Regional Health Systems [Submitted for publication] 2016
  29. Curry LA, Krumholz HM, O'Cathain A, et al. Mixed Methods in Biomedical and Health Services Research. *Circulation Cardiovascular quality and outcomes* 2013;6(1):119-23. doi: 10.1161/CIRCOUTCOMES.112.967885
  30. Hasson H. Systematic evaluation of implementation fidelity of complex interventions in health and social care. *Implementation Science* 2010;5(1):67. doi: 10.1186/1748-5908-5-67
  31. O'Cathain A, Murphy E, Nicholl J. Three techniques for integrating data in mixed methods studies. *BMJ* 2010;341 doi: 10.1136/bmj.c4587
  32. Wagner E, Austin B, Davis C, et al. Improving Chronic Illness Care: Translating Evidence Into Action. *Health Affairs* 2001;20(6):64-78.
  33. Wang Y, Kong M. Psychometric properties of the 8-item Morisky Medication Adherence Scale in patients taking warfarin
- Thrombosis and Haemostasis*  
2012;108(4):589-800.
34. Lam WY, Fresco P. Medication Adherence Measures: An Overview. *BioMed Research International* 2015;2015:217047. doi: 10.1155/2015/217047
  35. Wee H, Loke W, Li C, et al. Cross-Cultural Adaptation and Validation of Singapore Malay and Tamil Versions of the EQ-5D. *Annals of the Academy of Medicine, Singapore* 2007;36(6):403-8.
  36. Glasgow RE, Wagner EH, Schaefer J, et al. Development and Validation of the Patient Assessment of Chronic Illness Care (PACIC). *Medical Care* 2005;43(5):436-44.
  37. Krucien N, Le Vaillant M, Pelletier-Fleury N. Adaptation and validation of the patient assessment of chronic illness care in the French context. *BMC Health Services Research* 2014;14:269-69. doi: 10.1186/1472-6963-14-269

[Manuscript] Realist Evaluation of a Complex Integrated Care Program: a Study Protocol

- 1  
2  
3  
4  
5  
6  
7  
8  
9  
10  
11  
12  
13  
14  
15  
16  
17  
18  
19  
20  
21  
22  
23  
24  
25  
26  
27  
28  
29  
30  
31  
32  
33  
34  
35  
36  
37  
38  
39  
40  
41  
42  
43  
44  
45  
46  
47  
48  
49  
50  
51  
52  
53  
54  
55  
56  
57  
58  
59  
60
38. Cramm JM, Nieboer AP. Factorial validation of the patient assessment of chronic illness care (PACIC) and PACIC short version (PACIC-S) among cardiovascular disease patients in the Netherlands. *Health and Quality of Life Outcomes* 2012;10:104-04. doi: 10.1186/1477-7525-10-104
  39. Shah NR, Aragonés A, Schaefer EW, et al. Validation of the Spanish Translation of the Patient Assessment of Chronic Illness Care (PACIC) Survey. *Preventing Chronic Disease* 2008;5(4):A113.
  40. Liu L-J, Li Y, Sha K, et al. Patient Assessment of Chronic Illness Care, Glycemic Control and the Utilization of Community Health Care among the Patients with Type 2 Diabetes in Shanghai, China. *PLoS ONE* 2013;8(9):e73010. doi: 10.1371/journal.pone.0073010
  41. Aller M-B, Vargas I, Garcia-Subirats I, et al. A tool for assessing continuity of care across care levels: an extended psychometric validation of the CCAENA questionnaire. *International Journal of Integrated Care* 2013;13:e050.
  42. Hibbard JH, Mahoney ER, Stockard J, et al. Development and Testing of a Short Form of the Patient Activation Measure. *Health Services Research* 2005;40(6 Pt 1):1918-30. doi: 10.1111/j.1475-6773.2005.00438.x
  43. Linden A, Adams J, Roberts N. Evaluating Disease Management Program Effectiveness: An Introduction to Time Series Analysis *Disease Management* 2003;6(4):243-55.
  44. Kontopantelis E, Doran T, Springate DA, et al. Regression based quasi-experimental approach when randomisation is not an option: interrupted time series analysis. *The BMJ* 2015;350:h2750. doi: 10.1136/bmj.h2750
  45. Bradley EH, Curry LA, Devers KJ. Qualitative Data Analysis for Health Services Research: Developing Taxonomy, Themes, and Theory. *Health Services Research* 2007;42(4):1758-72. doi: 10.1111/j.1475-6773.2006.00684.x
  46. Nurjono M, Valentijn PP, Bautista MAC, et al. A Prospective Validation Study of a Rainbow Model of Integrated Care Measurement Tool in Singapore. *International Journal of Integrated Care* 2016;16(1):1. doi: 10.5334/ijic.2021
  47. Tsiachristas A. Payment and economic evaluation of integrated care. *International Journal of Integrated Care* 2015;15(2) doi: <http://doi.org/10.5334/ijic.2009>
  48. World Health Organization. CostIt [Available from: [http://www.who.int/choice/toolkit/cost\\_it/en/](http://www.who.int/choice/toolkit/cost_it/en/) accessed 16th March 2016.
  49. World Health Organization. Cost effectiveness and strategic planning (WHO-CHOICE) 2017 [Available from: [http://www.who.int/choice/costs/CER\\_levels/en/](http://www.who.int/choice/costs/CER_levels/en/) accessed 20 Dec 2016 2016.
  50. Fetters MD, Curry LA, Creswell JW. Achieving Integration in Mixed Methods Designs—Principles and Practices. *Health Services Research* 2013;48(6 Pt 2):2134-56. doi: 10.1111/1475-6773.12117
  51. Centres for Medicare & Medicaid Services. Next Generation ACO Model 2016 [Available from: <https://innovation.cms.gov/initiatives/Next-Generation-ACO-Model/> accessed 15 June 2016.
  52. England N. Integrated Care Pioneers 2016 [Available from: <https://www.england.nhs.uk/pioneers/> accessed 15 June 2016.
  53. England N. Health and high quality care for all, now and for future generations 2016 [Available from: <https://www.england.nhs.uk/ourwork/futurenhs/new-care-models/> accessed 15 June 2016.
  54. Kodner D. All together now: a conceptual exploration of integrated care *Healthcare Quarterly* 2009;13 Spec 6-15.
  55. GIDS. PILOOTPROJECTEN GEINTEGREERDE ZORG VOOR CHRONISCH ZIEKEN 2016 [Available from: [http://www.health.belgium.be/sites/default/files/uploads/fields/fpshealth\\_theme\\_file/gids\\_pilootprojecten\\_geintegreerde\\_zorg\\_voor\\_chronisch\\_zieken.pdf](http://www.health.belgium.be/sites/default/files/uploads/fields/fpshealth_theme_file/gids_pilootprojecten_geintegreerde_zorg_voor_chronisch_zieken.pdf) accessed 15 June 2016
  56. NSW Government. Integrated Care Demonstrators 2016 [Available from: <http://www.health.nsw.gov.au/wohp/Pages/demonstrators.aspx> accessed 15 June 2016.

## Funding

[Manuscript] Realist Evaluation of a Complex Integrated Care Program: a Study Protocol

1  
2 This study is funded by NUHS Research Office (Grant No: NUHSRO/2016/008/RO5+5/FY16CF/LOA) awarded  
3 to HJM Vrijhoef and taken over by Thomas Wee after HJM Vrijhoef changed positions.  
4  
5

#### 6 **Authors' contributions**

7 SAT, TW and HJMV initiated the study and HJMV conceptualized the study. HJMV and MN designed and  
8 constructed the first draft of study protocol. ST, SHW, KMF, SAT, TW and JY reviewed study protocol and  
9 provided feedback for the refinement of the protocol. MN, PS, AL, XYL, ST, SHW and KMF are involved in data  
10 collection and MN, PS, XYL and FS will be involved in data analysis related to this study. MN wrote up the first  
11 draft and final version of the manuscript. All authors read, provided suggestions for revision and approved the  
12 final manuscript.  
13

#### 14 **Acknowledgments**

15 We would like to thank Gerald Koh, Lim Yee Wei and Wee Hwee Lin for their advices for this study.  
16

#### 17 **Data sharing statement**

18 For access to the data set, a formal request should be sent to the corresponding author. The request will only be  
19 considered when the primary results of the study have been published  
20

#### 21 **Competing Interests**

22 ST, SHW, KMF, SAT and TW are a part of the NUHS-RHS strategic planning office which is involved in the  
23 planning and development of programs under the purview of the NUHS-RHS.  
24  
25  
26  
27  
28  
29  
30  
31  
32  
33  
34  
35  
36  
37  
38  
39  
40  
41  
42  
43  
44  
45  
46  
47  
48  
49  
50  
51  
52  
53  
54  
55  
56  
57  
58  
59  
60

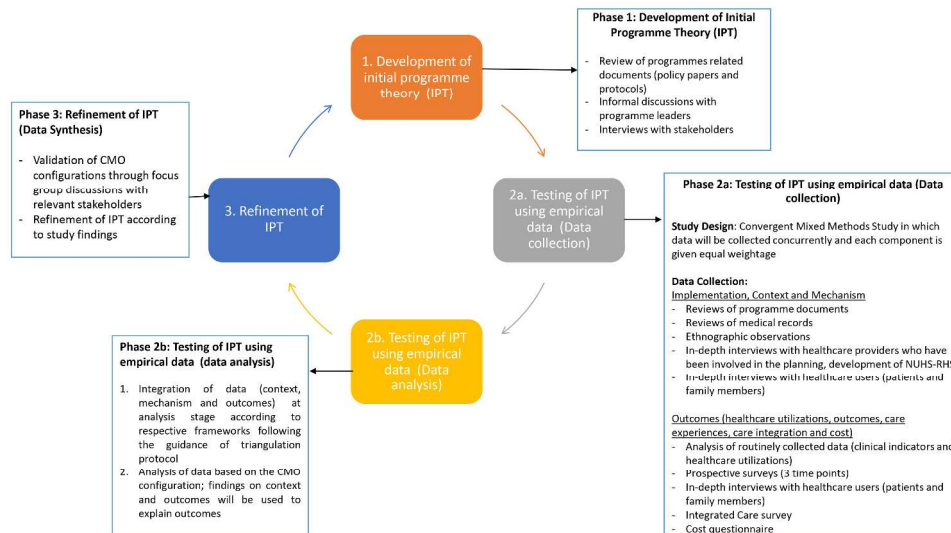

Figure 1: Realist evaluation processes and research phases according to Pawson and Tilley

338x190mm (300 x 300 DPI)

review only

1  
2  
3  
4  
5  
6  
7  
8  
9  
10  
11  
12  
13  
14  
15  
16  
17  
18  
19  
20  
21  
22  
23  
24  
25  
26  
27  
28  
29  
30  
31  
32  
33  
34  
35  
36  
37  
38  
39  
40  
41  
42  
43  
44  
45  
46  
47  
48  
49  
50  
51  
52  
53  
54  
55  
56  
57  
58  
59  
60



Figure 2: Logic model of NUHS-RHS

228x165mm (300 x 300 DPI)

Review only
